## Odd-paired controls frequency doubling in *Drosophila* segmentation by altering the pair-rule gene regulatory network

Erik Clark\* and Michael Akam

Department of Zoology, University of Cambridge, Cambridge, United Kingdom

\*Correspondence to: [ec491@cam.ac.uk](mailto:ec491@cam.ac.uk)

### 1 **ABSTRACT**

2

3 The *Drosophila* embryo transiently exhibits a double segment periodicity, defined by the expression of seven  
4 "pair-rule" genes, each in a pattern of seven stripes. At gastrulation, interactions between the pair-rule genes  
5 lead to frequency doubling and the patterning of fourteen parasegment boundaries. In contrast to earlier  
6 stages of *Drosophila* anterior-posterior patterning, this transition is not well understood. By carefully  
7 analysing the spatiotemporal dynamics of pair-rule gene expression, we show that frequency-doubling is  
8 precipitated by multiple coordinated changes to the network of regulatory interactions between the pair-rule  
9 genes. We identify the broadly expressed but temporally patterned transcription factor, Odd-paired  
10 (Opa/Zic), as the cause of these changes, and propose a new model for the patterning of even-numbered  
11 parasegment boundaries that relies on Opa-dependent regulatory interactions. Our findings indicate that the  
12 pair-rule gene regulatory network has a temporally-modulated topology, permitting the pair-rule genes to  
13 play stage-specific patterning roles.

14

15 *Keywords:* pair-rule genes; segmentation; *Drosophila*; patterning; gene regulatory network; Odd-paired; Zic

16

17

### 18 **INTRODUCTION**

19

20 Segmentation is a developmental process that subdivides an animal body axis into similar, repeating units  
21 (Hannibal & Patel 2013). Segmentation of the main body axis underlies the body plans of arthropods,  
22 annelids and vertebrates (Telford et al. 2008; Balavoine 2014; Graham et al. 2014). In arthropods,  
23 segmentation first involves setting up polarised boundaries early in development to define "parasegments"  
24 (Martinez-Arias & Lawrence 1985). Parasegment boundaries are maintained by an elaborate and strongly-

25 conserved signalling network of “segment-polarity” genes (Sanson 2001; Janssen & Budd 2013).

26

27 In all arthropods yet studied, the segmental stripes of segment-polarity genes are initially patterned by a  
28 group of transcription factors called the pair-rule genes (Green & Akam 2013; Peel et al. 2005; Damen et al.  
29 2005). The pair-rule genes were originally identified in a screen for mutations affecting the segmental pattern  
30 of the *Drosophila melanogaster* larval cuticle (Nüsslein-Volhard & Wieschaus 1980). They appeared to be  
31 required for the patterning of alternate segment boundaries (hence “pair-rule”), and were subsequently found  
32 to be expressed in stripes of double-segment periodicity (Hafen et al. 1984; Akam 1987).

33

34 Early models of *Drosophila* segmentation speculated that the blastoderm might be progressively patterned  
35 into finer-scale units by some reaction-diffusion mechanism that exhibited iterative frequency-doubling  
36 (reviewed in Jaeger 2009). The discovery of a double-segment unit of organisation seemed to support these  
37 ideas, and pair-rule patterning was therefore thought to be an adaptation to the syncytial environment of the  
38 early *Drosophila* embryo, which allows diffusion of gene products between neighbouring nuclei. However,  
39 the transcripts of pair-rule genes are apically localised during cellularisation of the blastoderm, and thus pair-  
40 rule patterning occurs in an effectively cellular environment (Edgar et al. 1987; Davis & Ish-Horowicz  
41 1991). Furthermore, double-segment periodicity of pair-rule gene expression is also found in sequentially  
42 segmenting (“short germ”) insects (Patel et al. 1994), indicating that pair-rule patterning predates the  
43 evolution of simultaneous (“long germ”) segmentation (Figure 1).

44

45 The next set of models for pair-rule patterning were motivated by genetic dissection of the early regulation of  
46 the segment-polarity gene *engrailed* (*en*). It was found that odd-numbered *en* stripes – and thus the anterior  
47 boundaries of odd-numbered parasegments (hereafter “odd-numbered parasegment boundaries”)– require the  
48 pair-rule gene *paired* (*prd*), but not another pair-rule gene *fushi tarazu* (*ftz*), while the opposite was true for  
49 the even-numbered *en* stripes and their associated (“even-numbered”) parasegment boundaries (DiNardo &  
50 O’Farrell 1987). Differential patterning of alternate segment-polarity stripes, combined with the observation  
51 that the different pair-rule genes are expressed with different relative phasings along the anterior-posterior  
52 (AP) axis, led to models where static, partially-overlapping domains of pair-rule gene expression form a  
53 combinatorial regulatory code that patterns the blastoderm with single cell resolution (DiNardo & O’Farrell

54 1987; Ingham & Gergen 1988; Weir et al. 1988; Morrissey et al. 1991).

55

56 However, pair-rule gene expression domains are not static. One reason for this is that their upstream  
57 regulators, the gap genes, are themselves dynamically expressed, exhibiting expression domains that shift  
58 anteriorly over time (Jaeger et al. 2004; El-Sherif & Levine 2016). Another major reason is that, in addition  
59 to directing the initial expression of the segment-polarity genes, pair-rule genes also cross-regulate one  
60 another. Pair-rule proteins and transcripts turn over extremely rapidly (Edgar et al. 1986; Nasiadka & Krause  
61 1999), and therefore regulatory feedback between the different pair-rule genes mediates dynamic pattern  
62 changes throughout the period that they are expressed. Most strikingly, many of the pair-rule genes undergo  
63 a transition from double-segment periodicity to single-segment periodicity at the end of cellularisation. The  
64 significance of this frequency-doubling is not totally clear. In some cases, the late, segmental stripes are  
65 crucial for proper segmentation (Cadigan et al. 1994b), in others they appear to be dispensable (Coulter et al.  
66 1990; Fujioka et al. 1995), or function (if any) is not known (Klingler & Gergen 1993; Jaynes & Fujioka  
67 2004).

68

69 More recent models of pair-rule patterning recognise that the pair-rule genes form a complex gene regulatory  
70 network that mediates dynamic patterns of expression (Edgar et al. 1989; Sánchez & Thieffry 2003; Jaynes  
71 & Fujioka 2004). However, whereas other stages of *Drosophila* segmentation have been extensively studied  
72 from a dynamical systems perspective (reviewed in Jaeger 2009; Grimm et al. 2010; Jaeger 2011), we do not  
73 yet have a good systems-level understanding of the pair-rule gene network (Jaeger 2009). This appears to be  
74 a missed opportunity: not only do the pair-rule genes exhibit fascinating transcriptional regulation, but their  
75 interactions are potentially very informative for comparative studies with other arthropod model organisms.  
76 These include the beetle *Tribolium castaneum*, in which the pair-rule genes form a segmentation oscillator  
77 (Sarrazin et al. 2012; Choe et al. 2006).

78

79 To better understand exactly how pair-rule patterning works in *Drosophila*, we carried out a careful analysis  
80 of pair-rule gene regulation during cellularisation and gastrulation, drawing on both the genetic literature and  
81 a newly-generated dataset of double-fluorescent *in situs*. Surprisingly, we found that the majority of  
82 regulatory interactions between pair-rule genes are not constant, but undergo dramatic changes just before

83 the onset of gastrulation. These regulatory changes mediate the frequency-doubling phenomena observed in  
84 the embryo at this time.

85

86 We then realised that all of the regulatory interactions specific to the late pair-rule gene regulatory network  
87 seem to require the non-canonical pair-rule gene *odd-paired (opa)*. *opa* was identified through the original  
88 *Drosophila* segmentation screen as being required for the patterning of the even-numbered parasegment  
89 boundaries (Jürgens et al. 1984). However, rather than being expressed periodically like the rest of the pair-  
90 rule genes, *opa* is expressed ubiquitously throughout the trunk region (Benedyk et al. 1994). The reported  
91 appearance of Opa protein temporally correlates with the time we see regulatory changes in the embryo,  
92 indicating that it may be directly responsible for these changes. We propose that Opa provides a source of  
93 temporal information that acts combinatorially with the spatial information provided by the periodically-  
94 expressed pair-rule genes. Pair-rule patterning thus appears to be a two-stage process that relies on the  
95 interplay of spatial and temporal signals to permit a common set of patterning genes to carry out stage-  
96 specific regulatory functions.

97

98

## 99 **RESULTS**

100

### 101 High-resolution spatiotemporal characterisation of wild-type pair-rule gene expression

102

103 We carried out double fluorescent *in situ* hybridisation on fixed wild-type *Drosophila* embryos for all  
104 pairwise combinations of the pair-rule genes *hairy*, *even-skipped (eve)*, *runt*, *fushi tarazu (ftz)*, *odd-skipped*  
105 (*odd*), *paired (prd)*, and *sloppy-paired (slp)*. Because the expression patterns of these genes evolve  
106 dynamically but exhibit little embryo-to-embryo variability (Surkova et al. 2008; Little et al. 2013; Dubuis et  
107 al. 2013), we were able to order images of individual embryos by inferred developmental age. This allowed  
108 us to produce pseudo time-series that illustrate how pair-rule gene expression patterns change relative to one  
109 another during early development (Figure 2).

110

111 The expression profile of each individual pair-rule gene has been carefully described previously (Hafen et al.

112 1984; Ingham & Pinchin 1985; Macdonald et al. 1986; Kilchherr et al. 1986; Gergen & Butler 1988; Coulter  
113 et al. 1990; Grossniklaus et al. 1992), and high quality relative expression data are available for pair-rule  
114 proteins (Pisarev et al. 2009). In addition, expression atlases facilitate the comparison of staged, averaged  
115 expression profiles of many different blastoderm patterning genes at once (Fowlkes et al. 2008). However,  
116 because the pair-rule genes are expressed extremely dynamically and in very precise patterns, useful extra  
117 information can be gleaned by directly examining relative expression patterns in individual embryos. In  
118 particular, we have found these data invaluable for understanding exactly how stripe phasings evolve over  
119 time, and for interrogating regulatory hypotheses. In addition, we have characterised pair-rule gene  
120 expression up until early germband extension, whereas blastoderm expression atlases stop at the end of  
121 cellularisation.

122

123 Our entire wild-type dataset (23 gene combinations, >500 individual embryos) is available from the authors  
124 upon request. We hope it proves useful to the *Drosophila* community.

125

126

### 127 Three main phases of pair-rule gene expression

128

129 We classify the striped expression of the pair-rule genes into three temporal phases (Figure 3A). Phase 1  
130 (equivalent to phase 1 of Schroeder et al. 2011; timepoint 1 in Figure 2) corresponds to early cellularisation,  
131 before the blastoderm nuclei elongate. Phase 2 (spanning phases 2 and 3 of Schroeder et al. 2011; timepoints  
132 2-4 in Figure 2) corresponds to mid cellularisation, during which the plasma membrane progressively  
133 invaginates between the elongated nuclei. Phase 3 (starting at phase 4 of Schroeder et al. 2011 but continuing  
134 beyond it; timepoints 5-6 in Figure 2) corresponds to late cellularisation and gastrulation. Our classification  
135 is a functional one, based on the times at which different classes of pair-rule gene regulatory elements  
136 (Figure 3B) have been found to be active in the embryo.

137

138 During phase 1, expression of specific stripes is established through compact enhancer elements mediating  
139 gap gene inputs (Pankratz & Jackle 1990). *hairy*, *eve* and *runt* all possess a full set of these “stripe-specific”  
140 elements, together driving expression in all seven stripes, while *ftz* lacks an element for stripe 4, and *odd*

141 lacks elements for stripes 2, 4 and 7 (Schroeder et al. 2011). These five genes are together classified as the  
142 “primary” pair-rule genes, because in all cases the majority of their initial stripe pattern is established *de*  
143 *novo* by non-periodic regulatory inputs. The regulation of various stripe-specific elements by gap proteins  
144 has been studied extensively (for example Small et al. 1992; Small et al. 1996).

145  
146 Phase 2 is dominated by the expression of so-called “zebra” (or “7-stripe”) elements (Hiromi et al. 1985;  
147 Dearolf et al. 1989; Butler et al. 1992). These elements, which tend to be relatively large (Gutjahr et al. 1994;  
148 Klingler et al. 1996; Schroeder et al. 2011), are regulated by pair-rule gene inputs and thus produce periodic  
149 output patterns. The stripes produced from these elements overlap with the stripes generated by stripe-  
150 specific elements, and often the two sets of stripes appear to be at least partially redundant. For example, *ftz*  
151 and *odd* lack a full complement of stripe-specific elements (see above), while the stripe-specific elements of  
152 *runt* are dispensable for segmentation (Butler et al. 1992). *hairy* and *eve* do not possess zebra elements, and  
153 thus their expression during phase 2 is driven entirely by their stripe-specific elements. We classify the “late”  
154 (or “autoregulatory”) element of *eve* (Goto et al. 1989; Harding et al. 1989) as part of phase 3 rather than  
155 phase 2, since this element turns on considerably after other zebra elements (Schroeder et al. 2011).

156  
157 In addition to the five primary pair-rule genes, there are two other pair-rule genes, *prd* and *slp*, that turn on  
158 after regular periodic patterns of the other genes have been established. These genes possess only a single,  
159 anterior stripe-specific element, and their trunk stripes are generated by a zebra element alone (Schroeder et  
160 al. 2011). Because (ignoring the head stripes) these genes are regulated only by other pair-rule genes, and not  
161 by gap genes, they are termed the “secondary” pair-rule genes.

162  
163 The third, “late” phase of expression is the least understood. Around the time of gastrulation, all of the pair-  
164 rule genes except *hairy* and *ftz* undergo a transition from double-segmental stripes to single-segmental  
165 stripes. For *prd*, this happens by splitting of its early, broad pair-rule stripes. In contrast, *eve*, *odd*, *runt* and  
166 *slp* show intercalation of “secondary” stripes between their “primary” 7-stripe patterns, although in the case  
167 of *eve* these secondary stripes are very weak. In some cases, discrete enhancer elements have been found that  
168 mediate just the secondary stripes (Klingler et al. 1996), while in other cases all 14 segmental stripes are  
169 likely to be regulated coordinately (Fujioka et al. 1995). In certain cases, non-additive interactions between

170 enhancers play a role in generating the segmental pattern (Prazak et al. 2010; Gutjahr et al. 1994). The  
171 functional significance of the late patterns is unclear, since they are usually not reflected in pair-rule gene  
172 mutant cuticle phenotypes (Kilchherr et al. 1986; Coulter et al. 1990).

173

174 In the remainder of this paper, we investigate the nature and causes of the pattern transitions that occur  
175 between the end of phase 2 and the beginning of phase 3. A detailed analysis of the timing and dynamics of  
176 pair-rule gene expression during phase 2 will be covered elsewhere.

177

178

179 Frequency-doubling of different pair-rule gene expression patterns is almost simultaneous, and coincides  
180 with segment-polarity gene activation

181

182 As noted above, five of the seven pair-rule genes undergo a transition from double-segment periodicity to  
183 single-segment periodicity at the end of cellularisation (Figure 3). These striking pattern changes could be  
184 caused simply by feedback interactions within the pair-rule and segment-polarity gene networks.

185 Alternatively, they could be precipitated by some extrinsic temporal signal (or signals).

186

187 Comparing between genes, we find that the pattern changes develop almost simultaneously (Figure 4; Figure  
188 4–figure supplement 1), although there are slight differences in the times at which the first signs of  
189 frequency-doubling become detectable. (The splitting of the trunk *prd* stripes can be detected just before the  
190 *odd* secondary stripes start to appear and the *eve* stripes start to sharpen, which is just prior to the appearance  
191 of the secondary stripes of *slp* and *runt*). These events appear to be spatiotemporally modulated: there is a  
192 short but noticeable AP time lag, and also a DV pattern – frequency-doubling occurs first mid-laterally, and  
193 generally does not extend across the dorsal midline. In addition, the secondary stripes of *slp* are not  
194 expressed in the mesoderm, while the ventral expression of *odd* secondary stripes is only weak.

195

196 We also investigated the timing of the frequency-doubling events relative to the appearance of expression of  
197 the segment-polarity genes *en*, *gooseberry* (*gsb*) and *wingless* (*wg*) (Figure 4; Figure 4–figure supplement 2).

198 We find that the spatiotemporal pattern of segment-polarity gene activation coincides closely with that of

199 pair-rule frequency-doubling – starting at the beginning of phase 3, and rapidly progressing over the course  
200 of gastrulation. Only around 20 minutes separate a late stage 5 embryo (with double-segment periodicity of  
201 pair-rule gene expression and no segment-polarity gene expression) from a late stage 7 embryo (with regular  
202 segmental expression of both pair-rule genes and segment-polarity genes) (Campos-Ortega & Hartenstein  
203 1985).

204

205 We can make three conclusions from the timing of these events. First, segment-polarity gene expression  
206 cannot be precipitating the frequency-doubling of pair-rule gene expression, because frequency-doubling  
207 occurs before segment-polarity proteins would have had time to be synthesised. Second, the late, segmental  
208 patterns of pair-rule gene expression do not play a role in regulating the initial expression of segment-  
209 polarity genes, because they are not reflected at the protein level until after segmental expression patterns of  
210 segment-polarity genes are observed. Third, the synchrony of pair-rule gene frequency-doubling and  
211 segment-polarity gene activation is consistent with co-regulation of these events by a single temporal signal.

212

213

214 The transition to single-segment periodicity is mediated by altered regulatory interactions

215

216 It is clear that a dramatic change overtakes pair-rule gene expression at gastrulation. For a given gene, an  
217 altered pattern of transcriptional output could result from an altered spatial pattern of regulatory inputs, or,  
218 alternatively, altered regulatory logic. Pair-rule proteins provide most of the spatial regulatory input for pair-  
219 rule gene expression at both phase 2 and phase 3. Therefore, the fact that the distributions of pair-rule  
220 proteins are very similar at the end of phase 2 and the beginning of phase 3 (Pisarev et al. 2009) suggests that  
221 it must be the “input-output functions” of pair-rule gene transcription that change to bring about the new  
222 expression patterns.

223

224 In this section we carefully examine pair-rule gene stripe phasings just before and just after the double-  
225 segment to single-segment transition. We find that these patterns do indeed indicate significant changes to  
226 the control logic of multiple pair-rule genes. Note that throughout what follows, italicised names (e.g. *eve*)  
227 are used to refer to genes and to the distributions of their transcript, whereas capitalised text (e.g. Eve) is



228 used to refer to proteins and their distributions.

229

230 Important conclusions from this section are summarised at the beginning of the next section. For an overview  
231 of the main argument in this paper, it is not necessary to follow in detail the evidence presented below for the  
232 regulatory changes affecting each gene.

233

234

235 *paired* (Figure 5)

236

237 Before frequency-doubling, the *prd* expression pattern is the additive result of broad stripes of medium  
238 intensity, and intense two-cell wide stripes at the posterior of each of the broad stripes (“P” stripes). The two  
239 sets of stripes are mediated by separate stretches of DNA (Gutjahr et al. 1994).

240

241 There is abundant experimental evidence that the splitting of the *prd* stripes is caused by direct repression by  
242 Odd protein. The primary stripes of *odd* lie within the broad *prd* stripes, and the secondary interstripes that  
243 form within these *prd* stripes at gastrulation correspond precisely to those cells that express *odd* (Figure 5D).  
244 Furthermore, the *prd* stripes do not split in *odd* mutant embryos (Baumgartner & Noll 1990; Saulier-Le  
245 Dréan et al. 1998), and the broad *prd* stripes (although not the “P” stripes) are completely repressed by  
246 ectopically-expressed Odd protein (Saulier-Le Dréan et al. 1998; Goldstein et al. 2005).

247

248 However, prior to *prd* stripe splitting, *prd* and *odd* are co-expressed in the same cells, with no sign that *prd* is  
249 sensitive to repression by Odd (Figure 5C). Because *prd* expression begins at a time when Odd protein is  
250 already present (Pisarev et al. 2009), this co-expression cannot be explained by protein synthesis delays. We  
251 therefore infer that Odd only becomes a repressor of *prd* at gastrulation, consistent with previous  
252 observations that aspects of Odd regulatory activity are temporally restricted (Saulier-Le Dréan et al. 1998).  
253 Other aspects of *prd* regulation will be discussed elsewhere (manuscript in preparation).

254

255

256 *odd-skipped* (Figure 6; Figure 6–figure supplement 1)

257

258 During phase 2, the primary stripes of *odd* have anterior boundaries defined by repression by Eve, and  
259 posterior boundaries defined by repression by Hairy (Manoukian & Krause 1992; Jiménez et al. 1996; Figure  
260 6A,C). Note that primary pair-rule stripes shift anteriorly over the course of cellularisation (Surkova et al.  
261 2008), and protein distributions lag slightly behind transcript distributions due to time delays inherent in  
262 protein synthesis and decay. This means that slight gaps tend to be present between the anterior border of a  
263 stripe and the transcripts of its anterior repressor (e.g. Figure 6A, Figure 7C), whereas slight overlaps may be  
264 seen between the posterior border of a stripe and the transcripts of its posterior repressor (e.g. Figure 6C,  
265 Figure 8C).

266

267 The primary stripes of *odd* narrow during phase 3, mainly from the posterior, and secondary stripes  
268 intercalate between them. It is not known whether all components of the single-segmental pattern observed at  
269 phase 3 are driven by a single enhancer, but we think it likely. The following analysis assumes that primary  
270 and secondary stripes of *odd* are governed by identical regulatory logic during phase 3.

271

272 The secondary stripes arise within cells expressing both Eve and Hairy (Figure 6B,D), indicating that  
273 repression of *odd* by these proteins is restricted to phase 2. A loss of repression by Hairy during phase 3 is  
274 also supported by increased overlaps between *hairy* and the *odd* primary stripes (Figure 6D). The posterior  
275 boundaries of the *odd* secondary stripes appear to be defined by repression by Runt. In wild-type embryos,  
276 these boundaries precisely abut the anterior boundaries of the *runt* primary stripes (Figure 6F), whereas in  
277 *runt* mutant embryos they expand posteriorly (Jaynes & Fujioka 2004). However, *odd* is evidently not  
278 repressed by Runt during phase 2, because the *odd* primary stripes overlap with the posterior of the *runt*  
279 stripes (Figure 6E). The anterior boundaries of the *odd* secondary stripes appear to be defined by repression  
280 from Prd (Figure 5D), consistent with the observation that these stripes expand anteriorly in *prd* mutant  
281 embryos (Mullen & DiNardo 1995). Since the *odd* primary stripes overlap with *prd* expression during phase  
282 2 (Figure 5C), it is possible that repression of *odd* by Prd is restricted to phase 3. However, Prd protein  
283 appears relatively late during phase 2 (Pisarev et al. 2009), and Prd protein degradation is upregulated  
284 specifically in the region of the *odd* primary stripes (Raj et al. 2000), suggesting that Prd would have little  
285 effect on *odd* expression during phase 2 either way.

286

287 Thus there appear to be multiple changes to the regulation of *odd* between phase 2 and phase 3 (Figure 6–  
288 figure supplement 1): loss of repression by Eve and Hairy, and gain of repression by Runt, and possibly Prd.  
289 The lack of repression by Eve and Hairy does not compromise the late patterning of the primary *odd* stripes,  
290 because their patterning roles are taken over by new repressors. Slp protein appears at the end of  
291 cellularisation and takes over from Hairy at the posterior boundaries (Figure 6H; Jaynes & Fujioka 2004).  
292 The new repression from Runt (and later, from En) seems to take over from Eve at the anterior boundaries  
293 (see below).

294

295

296 *sloppy-paired* (Figure 7; Figure 7–figure supplement 1)

297

298 The primary stripes of *slp* appear at the end of phase 2, while the secondary stripes appear shortly afterwards,  
299 at the beginning of phase 3. In contrast to the other pair-rule genes, *slp* stripes are static and stable, with  
300 dynamic pattern refinements restricted to the head region. The *slp* locus has a large, complex regulatory  
301 region, with many partially redundant enhancer elements (Fujioka & Jaynes 2012). A detailed study of two  
302 of these elements showed that the primary stripes are mediated by one element, while the secondary stripes  
303 require an additional enhancer that interacts non-additively with the first element (Prazak et al. 2010).

304

305 The primary stripes of *slp* are thought to be patterned by repression from Eve at their posteriors and  
306 repression by the combination of Runt and Ftz at their anteriors (Swantek & Gergen 2004). There is plentiful  
307 evidence for repression of *slp* by Eve throughout segmentation (Figure 7A,B; Fujioka et al. 1995; Riechmann  
308 et al. 1997; Jaynes & Fujioka 2004; Swantek & Gergen 2004; Prazak et al. 2010). However, while the  
309 posterior boundaries of the Runt primary stripes do appear to define the anterior boundaries of the *slp*  
310 primary stripes (Figure 7C; Figure 9), we are not convinced that Runt and Ftz act combinatorially to repress  
311 *slp* (Figure 7–figure supplement 2).

312

313 We find that in *ftz* mutant embryos, the *slp* primary stripes form fairly normally during phase 2, with their  
314 anterior boundaries still seemingly defined by Runt, rather than expanding anteriorly to overlap the (Eve-

315 negative) posterior halves of the *runt* stripes. Ectopic *slp* expression does not appear until phase 3. This  
316 indicates that Runt is able to repress *slp* in the absence of Ftz, at least temporarily. We therefore propose that  
317 during phase 2, *slp* is repressed by both Eve and Runt, regardless of whether Ftz is present, and that the  
318 anterior boundaries of the *slp* primary stripes are initially patterned by Runt alone.

319  
320 In wild-type embryos, the *slp* secondary stripes appear at phase 3, in the anterior halves of the *runt* stripes  
321 (Figure 7D). There are competing models for how they are regulated. One model proposes that they are  
322 activated by Runt, but repressed by the combination of Runt and Ftz, so that their anterior boundary is  
323 defined by Runt and their posterior boundary is defined by Ftz (Swantek & Gergen 2004; Prazak et al. 2010).  
324 A different model proposes that their anterior boundaries are defined by repression by Eve, while their  
325 posterior boundaries are defined by repression by Odd (Jaynes & Fujioka 2004).

326  
327 The posterior borders of the *eve* primary stripes abut the anterior borders of the *runt* primary stripes during  
328 early phase 3 (Figure 8F). Mutual repression between Eve and Runt (Ingham & Gergen 1988; Manoukian &  
329 Krause 1992; Manoukian & Krause 1993; Klingler & Gergen 1993) temporarily stabilises these expression  
330 boundaries, which also correspond to the anterior boundaries of the *slp* secondary stripes. Because of the  
331 regulatory feedback between Eve and Runt, the distinct regulatory hypotheses of repression by Eve *versus*  
332 activation by Runt actually predict identical effects on the expression of *slp* in a variety of genetic  
333 backgrounds. Therefore, much of the experimental evidence cited in favour of each of these models does not  
334 really discriminate between them.

335  
336 When we look carefully at the early expression of the *slp* secondary stripes, we occasionally find *slp*  
337 expression in a *runt*-negative cell (arrowheads in Figure 7D), but we never observe cells expressing both *eve*  
338 and *slp* (Figure 7B, and data not shown). This indicates that Eve directly patterns the anterior boundaries of  
339 the *slp* secondary stripes, while the regulatory role of Runt is indirect. Consistent with this hypothesis, a  
340 reporter study found that Runt did not appear to directly regulate a *slp* enhancer that drives 14 stripes at  
341 phase 3 (Sen et al. 2010; Fujioka & Jaynes 2012).

342  
343 While *ftz* and *odd* are subject to similar regulation during phase 2 and consequently have similar expression

344 domains, the slightly broader Ftz stripes appear to define the posterior boundary of *slp* secondary stripe  
345 expression (Figure 7F). This does not rule out Odd as a repressor of *slp*, however. Indeed, experimental  
346 evidence supports direct repression of *slp* by Odd (Saulier-Le Dréan et al. 1998) as well as by Ftz (Nasiadka  
347 & Krause 1999; Swantek & Gergen 2004; Prazak et al. 2010). Repression from Odd is likely to stabilise the  
348 anterior boundaries of both sets of *slp* stripes during late phase 3 (Figure 7H).

349

350 We see no compelling evidence that the repressive activity of Ftz on *slp* is mediated by Runt. It is clear that  
351 the presence or absence of Runt has dramatic effects on the expression pattern of *slp*, and that this is  
352 modified by the presence or absence of Ftz (Swantek & Gergen 2004; Prazak et al. 2010). However, we  
353 think that these effects are likely to be explained either by indirect interactions or by the repressive role of  
354 Runt during phase 2 (see above).

355

356 We thus conclude that regulation of *slp* undergoes several changes at phase 3 (Figure 7–figure supplement  
357 1). Repression by Runt is lost, while repression by Ftz and Odd is gained. Our proposed repressive role of  
358 Runt is in contrast to previous reports that Runt activates *slp*. Also in contrast to previous reports, we do not  
359 find evidence for a combinatorial interaction between Ftz and Runt. Instead, we think that their roles are  
360 temporally separate, with Runt acting at phase 2 and Ftz acting at phase 3.

361

362

363 *runt* (Figure 8; Figure 8–figure supplement 1)

364

365 During phase 2, the primary stripes of *runt* are broadly out of phase with those of *hairy* (Figure 8A). There is  
366 good evidence for repression of *runt* by Hairy (Ingham & Gergen 1988; Klingler & Gergen 1993; Jiménez et  
367 al. 1996), and it is commonly thought that Hairy defines both the anterior and posterior boundaries of *runt*  
368 expression (e.g. Edgar et al. 1989; Schroeder et al. 2011). However, we find clear gaps between the posterior  
369 boundaries of *runt* expression and the anterior boundaries of *hairy* expression (arrowheads in Figure 8A),  
370 indicating that some other pair-rule gene must be repressing *runt* from the posterior. We propose that the  
371 posterior boundaries of the *runt* primary stripes are defined by repression from Odd (Figure 8C). This  
372 hypothesis is strongly supported by the observations that the *runt* stripes widen slightly in *odd* mutant

373 embryos and are directly repressed by ectopic Odd (Saulier-Le Dréan et al. 1998).

374

375 During phase 3, new *runt* expression appears to the posterior of the primary stripes, and gradually intensifies  
376 to form the secondary stripes. At the same time, the primary stripes narrow from the posterior, producing a  
377 “splitting” of the broadened *runt* domains (Klingler & Gergen 1993). The two sets of stripes are initially  
378 driven by different enhancers, although each of the two enhancers later drive 14 segmental stripes during  
379 germband extension (Klingler et al. 1996). This indicates that the primary and secondary *runt* stripes are  
380 subject to different regulatory logic during phase 3.

381

382 During cellularisation, the anterior of each *runt* stripe overlaps with *eve* expression (Figure 8E), and  
383 accordingly Eve does not appear to repress *runt* during this stage (Manoukian & Krause 1992). However,  
384 Eve starts to repress *runt* at phase 3 (Manoukian & Krause 1992; Klingler & Gergen 1993). Eve appears to  
385 act on both sets of *runt* stripes, defining the posterior boundaries of the secondary stripes as well as the  
386 anterior boundaries of the primary stripes (Figure 8F).

387

388 It has been hypothesised that the narrowing of the *runt* primary stripes is caused by direct repression by Ftz  
389 (Klingler & Gergen 1993; Wolff et al. 1999). However, this is not supported by Ftz misexpression (Nasiadka  
390 & Krause 1999). Indeed, we find that the posteriors of the *runt* primary stripes continue to overlap with the  
391 anteriors of the *ftz* stripes for a considerable period during phase 3, ruling out direct repression by Ftz (Figure  
392 8H). Instead, the posteriors of the *runt* primary stripes appear to be repressed by the even-numbered En  
393 stripes, which are activated by Ftz (Klingler & Gergen 1993; DiNardo & O’Farrell 1987). Before the  
394 appearance of En protein, the posterior boundaries continue to be defined by repression from Odd (Figure  
395 8D).

396

397 We have not investigated whether Hairy continues to repress the regulatory element driving the *runt* primary  
398 stripes during phase 3, although it is possible it does not. However, it is clear that Hairy does not repress the  
399 element driving the *runt* secondary stripes, because they are located within domains of *hairy* expression  
400 (Figure 8B). The secondary stripes also overlap with Odd expression (Figure 8D), indicating that, unlike the  
401 primary stripes, they are not sensitive to repression by Odd.

402

403 It is not clear what defines the anterior boundaries of the *runt* secondary stripes. The locations of these  
404 stripes correlate very closely with those of the *slp* primary stripes, in both wild-type and *ftz* mutant embryos  
405 (see Figure 7–figure supplement 2). However, because *runt* expression is not noticeably affected in *slp*  
406 mutant embryos (Klingler & Gergen 1993), this must result from shared regulation rather than a patterning  
407 role for Slp itself. Indeed, Eve defines the posterior boundaries of both the *slp* primary stripes and the *runt*  
408 secondary stripes (see above). The anterior boundaries of the *slp* primary stripes are defined by repression by  
409 the Runt primary stripes (see above), raising the possibility that the *runt* secondary stripes are regulated in  
410 the same way, at least initially. If true, this would be the first example of direct autorepression by a pair-rule  
411 gene during segmentation.

412

413 Finally, Prd is required for the expression of the secondary stripes (Klingler & Gergen 1993). Prd appears to  
414 provide general activatory input to the element driving the stripes, but is unlikely to convey specific  
415 positional information, because the expression boundaries of the Prd stripes do not correspond to those of the  
416 *runt* secondary stripes (Figure 9B). Prd is also unlikely to provide temporal information to the element: the  
417 expression of the *runt* secondary stripes is delayed relative to the appearance of Prd protein (Pisarev et al.  
418 2009), suggesting that Prd alone is not sufficient for their activation.

419

420 In summary, there is one important change to the regulation of the *runt* zebra element at phase 3 (Figure 8–  
421 figure supplement 1). Repression by Eve is gained, and may potentially replace repression by Hairy. In  
422 addition, a separate element driving the secondary stripes begins to be expressed at phase 3. This element  
423 appears to be repressed by Eve and perhaps Runt, and activated by Prd.

424

425

426 *even-skipped*

427

428 *eve* does not possess a zebra element active during phase 2, and therefore its regulation does not come under  
429 control of the pair-rule network until its “late” element turns on at phase 3. This element generates strong  
430 expression in the anterior halves of the pre-existing early *eve* stripes. The posterior boundaries of the late

431 stripes are temporarily defined by repression by Runt, while the anterior boundaries are defined by  
432 repression by Slp (Figure 7B; Figure 8F; Jaynes & Fujioka 2004). Odd also represses late *eve* (Saulier-Le  
433 Dréan et al. 1998), and will temporarily compensate for the lack of repression by Slp in *slp* mutant embryos  
434 (Figure 6B; Jaynes & Fujioka 2004). The late *eve* stripes do not persist long after gastrulation, largely owing  
435 to the appearance of En protein, another repressor of *eve* (Harding et al. 1986).

436

437 In addition to the strong “major” stripes at the anteriors of the odd-numbered parasegments, faint “minor”  
438 stripes of *eve* expression appear during gastrulation in the anteriors of the even-numbered parasegments  
439 (Macdonald et al. 1986; Frasch et al. 1987; Figure 9C). These stripes are also driven by the late element  
440 (Fujioka et al. 1995), and are therefore likely to share the same regulatory logic as the major stripes. They do  
441 not appear to play any role in patterning, since deletions of the *eve* late element do not affect the patterning  
442 of the even-numbered parasegment boundaries (Fujioka et al. 1995; Fujioka et al. 2002).

443

444

445 Other pair-rule genes

446

447 In contrast to the other pair-rule genes, *hairy* and *ftz* do not show signs of significantly altered spatial  
448 regulation at gastrulation (Figure 9). The *hairy* stripes, which are regulated by stripe-specific elements, begin  
449 to fade away. During phase 2, the anterior boundaries of the *ftz* stripes are defined by repression by Eve,  
450 while the posterior boundaries are defined by repression by Hairy (Ish-Horowicz & Pinchin 1987; Carroll et  
451 al. 1988; Frasch et al. 1988; Ingham & Gergen 1988; Vavra & Carroll 1989; Manoukian & Krause 1992;  
452 Jiménez et al. 1996). The *ftz* stripes narrow from the posterior at phase 3, but this appears to be simply due to  
453 the new appearance of Slp protein, which also represses *ftz* (Cadigan et al. 1994b), rather than evidence for  
454 altered regulatory logic (Figure 9B). Autoregulation is likely to play a role in maintaining the late *ftz*  
455 expression pattern (Hiromi & Gehring 1987; Schier & Gehring 1992), perhaps indicating that sustained  
456 repression of *ftz* expression within the interstripes by other pair-rule proteins may not be strictly necessary.

457

458

459 A candidate temporal signal: Odd-paired



460

461 To summarise the results of the previous section, a number of regulatory interactions seem to disappear at  
462 the beginning of phase 3: repression of *odd* by Hairy, repression of *odd* by Eve, and repression of *slp* by  
463 Runt. These regulatory interactions are replaced by a number of new interactions: repression of *prd* by Odd,  
464 repression of *odd* by Runt, repression of *runt* by Eve, and repression of *slp* by Ftz. At the same time that  
465 these regulatory changes are observed, new elements for *eve* and *runt* turn on and various segment-polarity  
466 genes start to be expressed. The outcome of all of these regulatory changes is a coordinated transition to  
467 single segment periodicity. We have schematised this transition in Figure 9. Our diagrams are in broad  
468 agreement with the interpretation of Jaynes and Fujioka (Jaynes & Fujioka 2004), although we characterise  
469 the process in greater temporal detail and distinguish between transcript and protein distributions at each  
470 timepoint.

471

472 Having identified all of the regulatory changes detailed above, we wanted to know how they are made to  
473 happen in the embryo. Because they all occur within a very short time window (Figure 4), they could  
474 potentially all be regulated by a single temporal signal that would instruct a regulatory switch. We reasoned  
475 that if this hypothetical signal were absent, the regulatory changes would not happen. This would result in a  
476 mutant phenotype in which frequency-doubling events do not occur, and segment-polarity expression is  
477 delayed.

478

479 We then realised that this hypothetical phenotype was consistent with descriptions of segmentation gene  
480 expression in mutants of the non-canonical “pair-rule” gene, *opa* (Benedyk et al. 1994). This gene is required  
481 for the splitting of the *prd* stripes and the appearance of the secondary stripes of *odd* and *slp* (Baumgartner &  
482 Noll 1990; Benedyk et al. 1994; Swantek & Gergen 2004). It is also required for the late expression of *runt*  
483 (Klingler & Gergen 1993), and for the timely expression of *en* and *wg* (Benedyk et al. 1994). In contrast, *ftz*,  
484 which does not exhibit altered regulation at gastrulation, is expressed normally in *opa* mutant embryos  
485 (Benedyk et al. 1994).

486

487 The *opa* locus was originally isolated on account of its cuticle phenotype, in which odd-numbered segments  
488 (corresponding to even-numbered parasegments) are lost (Jürgens et al. 1984). For many years afterwards,

489 *opa* was assumed to be expressed in a periodic pattern of double-segment periodicity similar to the other  
490 seven pair-rule genes (for example, Coulter & Wieschaus 1988; Ingham et al. 1988; Weir et al. 1988;  
491 Baumgartner & Noll 1990; Lacalli 1990). When *opa*, which codes for a zinc finger transcription factor, was  
492 finally cloned, it was found - surprisingly - to be expressed uniformly throughout the trunk (Benedyk et al.  
493 1994). Presumed to be therefore uninformative for spatial patterning, it has received little interest in the  
494 context of segmentation since. However, we realised that Opa could still be playing an important role in  
495 spatial patterning. By providing temporal information that would act combinatorially with the spatial  
496 information carried by the canonical pair-rule genes, Opa might permit individual pair-rule genes to carry out  
497 different patterning roles at different points in time.

498

499

#### 500 Expression of *opa* spatiotemporally correlates with patterning events

501

502 We examined *opa* expression relative to other segmentation genes, and found an interesting correlation with  
503 the spatiotemporal pattern of segmentation (Figure 10). As previously reported, the earliest expression of *opa*  
504 is in a band at the anterior of the trunk, which we find corresponds quite closely with the head stripe of *prd*  
505 (data not shown). Expression in the rest of the trunk quickly follows, and is stronger ventrally than dorsally.  
506 *opa* begins to be transcribed throughout the trunk during phase 1, before regular patterns of pair-rule gene  
507 expression emerge. The sharp posterior border of the *opa* domain at first lies just anterior to *odd* stripe 7, but  
508 gradually shifts posteriorly over the course of gastrulation to encompass it. Notably, *odd* stripe 7 is the last of  
509 the primary pair-rule gene stripes to appear, and segmentation of this posterior region of the embryo appears  
510 to be significantly delayed relative to the rest of the trunk (Kuhn et al. 2000).

511

512 The timing of *opa* transcription has been shown to rely on nuclear / cytoplasmic ratio (Lu et al. 2009), and  
513 begins relatively early during cellularisation. However, it takes a while for the *opa* expression domain to  
514 reach full intensity. Unlike the periodically-expressed pair-rule genes, which have compact transcription  
515 units (all <3.5 kb, FlyBase) and are therefore rapidly synthesised, the *opa* transcription unit is large (~17 kb,  
516 FlyBase), owing mainly to a large intron. Accordingly, during most of cellularisation we observe a punctate  
517 distribution of *opa*, suggestive of nascent transcripts located within nuclei (Figure 10–figure supplement 1).

518 Unfortunately, the available polyclonal antibody against Opa (Benedyk et al. 1994) did not work well in our  
519 hands, so we have not been able to determine precisely what time Opa protein first appears in blastoderm  
520 nuclei. However, Opa protein levels have been reported to peak at late cellularisation and into gastrulation  
521 (Benedyk et al. 1994), corresponding to the time at which we observe regulatory changes in the embryo, and  
522 consistent with our hypothesised role of Opa as a temporal signal.

523

524

525 *opa* mutant embryos do not transition to single-segment periodicity at gastrulation

526

527 If our hypothesised role for Opa is correct, patterning of the pair-rule genes should progress normally in *opa*  
528 mutant embryos up until the beginning of phase 3, but not undergo the dramatic pattern changes observed at  
529 this time in wild-type. Instead, we would expect that the double-segmental stripes would persist unaltered, at  
530 least while the activators of phase 2 expression remain present. The pair-rule gene expression patterns that  
531 have been previously described in *opa* mutant embryos (those of *prd*, *slp*, *odd*, *runt* and *ftz*, see above) seem  
532 consistent with this prediction, however we wanted to characterise the *opa* mutant phenotype in more detail  
533 in order to be sure.

534

535 During cellularisation, we find that pair-rule gene expression is relatively normal in *opa* mutant embryos  
536 (Figure 11A), consistent with our hypothesis that this phase of expression is not regulated by Opa. The one  
537 exception is that the appearance of the *slp* primary stripes may be slightly delayed compared to wild-type.  
538 These stripes normally appear towards the end of cellularisation, only shortly before the secondary stripes  
539 appear at phase 3.

540

541 In contrast, pair-rule gene expression becomes dramatically different from wild-type at gastrulation (Figure  
542 11B). Most notably, the transition from double-segment to single-segment periodicity is not observed for any  
543 pair-rule gene. As previously reported (Benedyk et al. 1994; Swantek & Gergen 2004), the secondary stripes  
544 of *odd* and *slp* do not appear. The *prd* stripes do not split (Baumgartner & Noll 1990), although we note that  
545 cells in the centres of the stripes do exhibit markedly less intense expression than those at the anterior and  
546 posterior edges. The *ftz* stripes persist as normal (Benedyk et al. 1994), although they seem a little wider than

547 wild-type, perhaps owing to the delayed expression of the *slp* primary stripes. *hairy* expression fades away as  
548 normal (data not shown). *eve* expression in *opa* mutant embryos has not to our knowledge been previously  
549 described. We find that *eve* expression fades away at gastrulation, with no sign of the sharpened “late”  
550 expression normally activated in the anteriors of the early stripes. Finally, as previously reported (Klingler &  
551 Gergen 1993), *runt* expression is much reduced; only primary stripes 6 and 7 continue to be expressed  
552 strongly, while the secondary stripes appear but are irregular and weak.

553

554 In summary, *odd*, *slp*, *prd* and *ftz* remain expressed strongly in stripes of double-segment periodicity, similar  
555 to their expression at the end of phase 2, while expression of *hairy*, *eve* and *runt* is largely lost (Figure 11–  
556 figure supplement 1).

557

558

#### 559 Opa accounts for the regulatory changes observed at gastrulation

560

561 Many of the altered expression patterns in *opa* mutant embryos (Figure 11B; Figure 11–figure supplement 1)  
562 appear to directly reflect an absence of the regulatory changes normally observed in wild-type at  
563 gastrulation. The altered *prd* expression in *Opa* mutants is consistent with *Odd* failing to repress *prd*,  
564 indicating that *Odd* only acts as a repressor of *prd* in combination with *Opa*. Similarly, the absence of the  
565 secondary stripes of *odd* and *slp* suggest that *Eve* continues to repress *odd* in the absence of *Opa* and *Runt*  
566 continues to repress *slp*.

567

568 Whereas the expression of *prd*, *slp* and *odd* persists strongly in *opa* mutant embryos, albeit in abnormal  
569 patterns, the late expression of *eve* and *runt* is either absent or strongly reduced. This indicates first that the  
570 activators that drive expression of these genes during phase 2 do not persist in the embryo after the end of  
571 cellularisation, and second that the expression of these genes during phase 3 is directly activated by the new  
572 appearance of *Opa*. This is not too surprising for *eve*, which has phase 2 expression driven by stripe-specific  
573 elements and phase 3 expression driven by a separate element. Expression of stripe-specific elements is  
574 known to fade away at gastrulation, as seen for the entire *hairy* pattern (Ingham et al. 1985), or for stripe-  
575 specific reporter elements (Bothma et al. 2014). However, a single stretch of DNA drives *runt* primary stripe

576 expression at both phase 2 and phase 3 (Klingler et al. 1996). This suggests that the organisation and  
577 regulatory logic of this element may be complex, as it is evidently activated by different factors at different  
578 times.

579

580 We have not investigated whether Hairy still represses its targets during phase 3 in *opa* mutant embryos.  
581 However, all of the other phase-specific regulatory interactions we detected in wild-type appear to be  
582 modulated by Opa, and thus explained by the onset of Opa regulatory activity at gastrulation. Therefore, the  
583 presence or absence of Opa significantly affects the topology of the pair-rule gene regulatory network.

584

585

586 Opa appears to activate the *eve* late element

587

588 The element driving “late” *eve* expression is sometimes referred to as the *eve* “autoregulatory” element,  
589 because expression from it is lost in *eve* mutant embryos (Harding et al. 1989; Jiang et al. 1991). However,  
590 the observed “autoregulation” appears to be indirect (Goto et al. 1989; Manoukian & Krause 1992; Fujioka  
591 et al. 1995; Sackerson et al. 1999). Instead of being directly activated by Eve, the element mediates  
592 regulatory inputs from repressors such as Runt and Slp, which are ectopically expressed in *eve* mutant  
593 embryos (Vavra & Carroll 1989; Klingler & Gergen 1993; Riechmann et al. 1997; Jaynes & Fujioka 2004).  
594 The element is thought to be activated by Prd, and functional *prd* binding sites have been demonstrated  
595 within the element (Fujioka et al. 1996). However, while Prd protein appears at roughly the right time to  
596 activate the *eve* late element (Pisarev et al. 2009), we do not think that activation by Prd is an adequate  
597 explanation for the expression generated from this element, because much of the early expression from this  
598 element occurs in cells that do not express *prd* (Figure 12–figure supplement 1).

599

600 Instead, we suggest that the *eve* late element may be directly activated by Opa. In *opa* mutant embryos, the  
601 strong, sharply-defined expression that normally appears in the anteriors of the *eve* stripes at phase 3 is not  
602 observed (except for stripe 1), leaving only the weaker and broader stripe domains generated by the stripe  
603 specific elements (Figure 12). This is similar to what is observed in embryos in which the late element has  
604 been deleted (Fujioka et al. 1995; Fujioka et al. 2002). We think that the lack of late *eve* expression in *opa*

605 mutant embryos results from a failure to activate the late element, rather than the ectopic expression of  
606 repressive inputs, since none of *runt*, *odd* or *slp* are ectopically expressed in the domains where *eve* late  
607 element expression would normally be seen (Figure 11–figure supplement 1).

608

609

#### 610 A new model for the patterning of the even-numbered *engrailed* stripes

611

612 One particularly intriguing feature of *opa* mutant embryos is that the offset between the anterior boundaries  
613 of the *ftz* and *odd* stripes is largely absent (Benedyk et al. 1994; Figure 13). In wild-type embryos, the  
614 anterior boundaries of the *odd* primary stripes are shifted posteriorly relative to those of the *ftz* stripes by  
615 about one cell row. This relative phasing is responsible for patterning the even-numbered *en* stripes, which  
616 are activated by Ftz but repressed by Odd (Coulter et al. 1990; Manoukian & Krause 1992; Mullen &  
617 DiNardo 1995).

618

619 The offsets between the anterior boundaries of *ftz* and *odd* require the presence of the early Eve stripes  
620 (Fujioka et al. 1995). It is thought that the posterior halves of these stripes act as morphogen gradients that  
621 repress *odd* at lower concentrations of Eve than required to repress *ftz*, and thus differentially position the  
622 expression domains of the two genes (Fujioka et al. 1995; Manoukian & Krause 1992). We find this  
623 explanation unsatisfactory, for two reasons.

624

625 First, a careful analysis of wild-type gene expression calls into question the hypothesis that the early Eve  
626 stripes are functioning in this manner. Both *ftz* and *odd* lack a stripe-specific element for stripe 4, and so the  
627 expression seen in these stripes is a true reflection of regulatory control by pair-rule proteins, whereas  
628 inferences from the remaining stripes are complicated by gap protein-regulated contributions to the overall  
629 expression pattern. When the zebra element-driven expression of *ftz* and *odd* kicks in and stripe 4 appears,  
630 clear one cell wide offsets are seen at the anterior borders of most of the stripes, but are absent from stripe 4  
631 (Figure 13A). This suggests that Eve is not differentially regulating the two genes, and that the offsets that  
632 are seen in the other stripes are instead generated by bespoke positioning of individual stripes by stripe-  
633 specific elements.

634

635 Secondly, maintenance of the offsets between *ftz* and *odd* expression seems to require Opa function. In wild-  
636 type embryos, offsets are observed at gastrulation for all stripes, including stripe 4 (Figure 13C), indicating  
637 that *ftz* and *odd* must be differentially regulated by pair-rule proteins at this later stage. In *opa* mutant  
638 embryos, we find that the relative phasing of *ftz* and *odd* appears normal at cellularisation, with offsets  
639 present for most stripes, but absent for stripe 4 (Figure 13B). By gastrulation, however, the anterior  
640 boundaries of the two sets of stripes tend to coincide (Figure 13D). We therefore do not think that the early  
641 Eve stripes can be directly patterning the offsets, because early *eve* expression is normal in *opa* mutant  
642 embryos. Late *eve* expression is lost in *opa* mutant embryos (see above), but this phase of expression cannot  
643 be regulating the pattern either, because *eve* rescue constructs lacking the *eve* late element still produce the  
644 offsets (Fujioka et al. 1995). Therefore, the offsets must be patterned by a pair-rule protein other than Eve,  
645 by way of an Opa-dependent regulatory interaction.

646

647 Coincident anterior boundaries of *ftz* and *odd* could be produced by a posterior retraction of *ftz* expression, or  
648 alternatively by an anterior expansion of *odd* expression. We interpret the patterns in *opa* mutant embryos as  
649 representing the latter scenario. The *odd* stripes still share posterior boundaries with the *ftz* stripes (defined  
650 by repression from the Slp primary stripes), but appear wider than in wild-type embryos, consistent with de-  
651 repression at the anterior (Figure 13C,D). Furthermore, when we compare phasings of the *odd* stripes with  
652 those of *eve*, the domains of *odd* expression appear significantly anteriorly expanded in *opa* mutant embryos  
653 compared to wild-type (Figure 13–figure supplement 1)

654

655 Following from this reasoning, it appears that the *ftz/odd* offsets observed at gastrulation in wild-type  
656 embryos must be caused by anterior repression of *odd* (and not *ftz*) by an appropriately-located pair-rule  
657 protein in combination with Opa. We suggest that this protein is Runt. Above, we hypothesised that in wild-  
658 type embryos, Runt starts to repress *odd* at phase 3, thus defining the anterior boundaries of the *odd* primary  
659 stripes (Figure 6; Figure 6–figure supplement 1). We then identified Opa as being required for the regulatory  
660 changes observed at phase 3 (Figure 11; Figure 11–figure supplement 1).

661

662 This new model (Figure 13–figure supplement 2) explains the observations from *opa* mutants. In the absence



663 of Opa activity, Runt fails to repress *odd*, and the anterior boundaries of *odd* expression presumably continue  
664 to be defined by the posterior boundaries of the Eve stripes, which also define the anterior boundaries of the  
665 *ftz* stripes. This results in the loss of the *ftz/odd* offsets that pattern even-numbered *en* stripes in wild-type.

666

667 An updated model for the patterning of the even-numbered parasegment boundaries is presented in Figure  
668 14. We propose that the spatial information directly responsible for patterning these boundaries derives from  
669 overlapping domains of Runt and Ftz activity (Figure 8G,H). Ftz and Runt combinatorially specify distinct  
670 expression domains of *slp*, *en*, and *odd*, by way of late acting, Opa-dependent regulatory interactions. These  
671 interactions are lost in *opa* mutant embryos, and thus the boundaries are not specified.

672

673

#### 674 Opa spatially patterns *odd* stripe 7

675

676 We noticed that in *opa* mutant embryos, *odd* stripe 7 is expressed across the ventral midline, whereas in  
677 wild-type embryos it is only expressed laterally (Figure 15E,J). *odd* stripe 7 is both spatially and temporally  
678 unusual: in addition to its unique DV restriction, it first appears considerably after the other six *odd* stripes  
679 have been established. In fact, it is the only primary pair-rule stripe to appear after the trunk stripes of the  
680 secondary pair-rule gene *prd* are established (Figure 15–figure supplement 1).

681

682 We have described above how the anterior boundaries of the *odd* stripes are defined first by repression by  
683 Eve, and subsequently by repression by Runt, which requires the presence of Opa (Figure 13–figure  
684 supplement 2). When *odd* stripe 7 first appears, its anterior boundary correlates well with the posterior  
685 boundary of *eve* expression, and is likely be patterned by repression by Eve (Figure 15–figure supplement  
686 2C). The posterior boundary of *eve* stripe 7 then markedly shifts anteriorly, while *odd* stripe 7 remains static,  
687 suggesting that its anterior boundary is maintained by repression from some other protein (Figure 15–figure  
688 supplement 2D). However, the seventh stripe of *runt* is abnormally broad and completely encompasses the  
689 domain of *odd* expression (Figure 15–figure supplement 2B,D). Consequently, Runt cannot be providing  
690 spatial information to *odd* in this region of the embryo. It is therefore not clear which protein spatially  
691 delimits the anterior boundary of *odd* stripe 7 at gastrulation.



692

693 We suggest that it is actually Opa that patterns the anterior boundary of *odd* stripe 7. *odd* is repressed by the  
694 combination of Runt and Opa, but not by either gene alone. Theoretically, it makes no difference which  
695 protein provides the spatial information to pattern an expression domain of *odd*, as long as the repressive  
696 activity of the co-expressed proteins is appropriately localised. For *odd* stripes 2-6, Opa is expressed  
697 ubiquitously, while Runt is patterned. For *odd* stripe 7, we find that the position of its anterior boundary is  
698 prefigured by the posterior boundary of the broad *opa* expression domain (Figure 10B,C). Therefore, in the  
699 posterior of the embryo the situation seems to be the other way around: Runt is expressed ubiquitously, while  
700 Opa provides the necessary spatial information (Figure 15–figure supplement 3).

701

702 Because *odd* stripe 7 is so delayed relative to the other primary pair-rule stripes, there is only a short time  
703 between its appearance and the first signs of Opa regulatory activity in the embryo. Therefore, while the  
704 early expression of *odd* stripe 7 is likely to be patterned by Eve, repression by Runt + Opa would soon take  
705 over, explaining why *odd* stripe 7 remains static rather than shifting anteriorly in concert with *eve*.

706 Accordingly, we observe that in *opa* mutant embryos, where the *odd* anterior boundaries are presumably  
707 defined by Eve at all times, *odd* stripe 7 expands both anteriorly and ventrally over time, correlating well  
708 with the shifting posterior boundary of *eve* stripe 7 (Figure 15F-H). Indeed, in *opa* mutant embryos the  
709 anterior boundary of *odd* 7 is located at a similar position to the anterior boundary of *prd* stripe 8 (also likely  
710 to be defined by repression by Eve), whereas in wild-type it is offset from it posteriorly (Figure 15E,J).

711

712 The distinctive shape of *odd* stripe 7 can therefore be explained by the curvature of the *opa* posterior  
713 boundary. Thus, in this region of the embryo, Opa appears to convey both temporal and spatial information  
714 to the segmentation process.

715

716

## 717 **DISCUSSION**

718

719 Opa alters the pair-rule gene regulatory network

720

721 We have found that many regulatory interactions between the pair-rule genes are not constant over the  
722 course of *Drosophila* segmentation, but instead undergo coordinated changes at the end of cellularisation.  
723 We are not the first to notice that certain regulatory interactions do not apply to all stages of pair-rule gene  
724 expression (Baumgartner & Noll 1990; Manoukian & Krause 1992; Manoukian & Krause 1993; Fujioka et  
725 al. 1995; Saulier-Le Dréan et al. 1998). However, cataloguing and analysing these changes for the whole  
726 pair-rule system led us to the realisation that they are almost simultaneous and mediate the transition from  
727 double-segment to single-segment periodicity. We propose that the pair-rule system should not be thought of  
728 as a static gene regulatory network, but rather two temporally and topologically distinct networks, each with  
729 their own dynamical behaviour and consequent developmental patterning role.

730

731 Having recognised that the pair-rule gene regulatory network changes at gastrulation, we hypothesised that  
732 the product of the non-canonical pair-rule gene *opa* might act as a temporal signal and mediate the changes.  
733 We found that the spatiotemporal expression and mutant phenotype of *opa* were consistent with this  
734 hypothesis. In *opa* mutant embryos, the regulatory changes do not occur and as a consequence the even-  
735 numbered parasegment boundaries are not patterned. Therefore, rather than being an uninteresting protein  
736 required but not instructive for gene expression, it appears that Opa actually plays a crucial and fascinating  
737 role in segmentation, by orchestrating a fundamental patterning transition.

738

739

740 What is the mechanism of Opa regulatory activity?

741

742 *opa* is the *Drosophila* ortholog of *zinc finger of the cerebellum (zic)* (Aruga et al. 1994). *zic* genes code for  
743 zinc finger transcription factors closely related to Gli proteins and have many important developmental roles.

744

745 In the *Drosophila* embryo, Opa is involved in the formation of visceral mesoderm (Cimbora & Sakonju  
746 1995; Schaub & Frasch 2013), in addition to its role in segmentation. Opa is later highly expressed in the  
747 larval and adult brain (FlyAtlas – Chintapalli et al. 2007), and is likely to be involved in neuronal  
748 differentiation (Eroglu et al. 2014). It is also involved in the regulation of adult head development (Lee et al.  
749 2007).

750

751 This neuronal function is likely to reflect an ancestral role of *Zic*, as involvement of *Zic* genes in nervous  
752 system development and neuronal differentiation is pervasive throughout metazoans (Layden et al. 2010).  
753 Lineage-specific duplications have resulted in five *zic* genes in most vertebrate taxa, and seven in teleosts  
754 (Aruga et al. 2006; Merzdorf 2007). While partial redundancy between these paralogs complicates the  
755 interpretation of mutant phenotypes, it is clear that *Zic* proteins play crucial roles in early embryonic  
756 patterning, neurogenesis, left-right asymmetry, neural crest formation, somite development, and cell  
757 proliferation (reviewed in Merzdorf 2007; Houtmeyers et al. 2013).

758

759 *Zic* proteins have been shown to act both as classical DNA-binding transcription factors, and as cofactors  
760 that modulate the regulatory activity of other transcription factors via protein-protein interactions (reviewed  
761 in Ali et al. 2012; Winata et al. 2015). They show context-dependent activity and can both activate and  
762 repress transcription (Yang et al. 2000; Salero et al. 2001). In particular, they appear to be directly involved  
763 in the modulation and interpretation of Wnt and Hedgehog signalling (Murgan et al. 2015; Pourebrahim et al.  
764 2011; Fujimi et al. 2012; Koyabu et al. 2001; Chan et al. 2011; Quinn et al. 2012). Finally, they may play a  
765 direct role in chromatin regulation (Luo et al. 2015).

766

767 The roles that *Opa* plays in the *Drosophila* segmentation network appear to be consistent with the  
768 mechanisms of *Zic* regulatory activity that have been characterised in vertebrates. *Opa* appears to  
769 transcriptionally activate a number of pair-rule gene enhancers, including those driving late expression of *eve*  
770 and *slp*. In the case of the *slp* enhancer, this has been verified experimentally (Sen et al. 2010). In other  
771 cases, the role of *Opa* is likely to be restricted to modulating the effect of other regulatory inputs, such as  
772 mediating the repressive effect of *Odd* on *prd* expression. Finally, *Opa* seems often to provide a function that  
773 is intermediate between these activatory and modulatory roles, as when it (presumably) cooperates with *Prd*  
774 to activate segment-polarity gene expression (Benedyk et al. 1994; Morrissey et al. 1991; Copeland et al.  
775 1996). It will be interesting to investigate the enhancers mediating late pair-rule gene expression and  
776 determine how *Opa* interacts with them to bring about these varied effects.

777

778

779 Is Opa sufficient for the regulatory changes we observe at gastrulation?

780

781 Our data seem consistent with Opa being “the” temporal signal that precipitates the 7 stripe to 14 stripe  
782 transition. However, it remains possible that Opa acts in conjunction with some other, as yet unidentified,  
783 temporally patterned factor, or has activity that is overridden during cellularisation by some maternal or  
784 zygotic factor that disappears at gastrulation. Indeed, combinatorial interactions with DV factors do seem  
785 likely to be playing a role in restricting the effects of Opa: despite the *opa* expression domain encircling the  
786 embryo, many Opa-dependent patterning events do not extend into the mesoderm or across the dorsal  
787 midline. Identification of these factors should yield interesting insights into cross-talk between the AP and  
788 DV patterning systems of the *Drosophila* blastoderm.

789

790 The activity of Opa has previously been suggested to be concentration-dependent (Swanek & Gergen 2004).  
791 Supposing that Opa protein concentration increases progressively at the end of cellularisation, differential  
792 sensitivity to Opa activity might underlie the slightly different times at which we observe particular Opa-  
793 dependent expression changes in the embryo. For example, the splitting of the *prd* stripes moderately  
794 precedes the appearance of the secondary stripes of *odd* and *slp*. The effect on *prd* temporally coincides with  
795 the appearance of the *slp* primary stripes, which are slightly delayed in *opa* mutant embryos. These two  
796 events seem to reflect the earliest regulatory effects of Opa.

797

798 We note that while Opa may contribute to their timely activation, the *slp* primary stripes do not strictly  
799 require Opa activity. This is not surprising, since the *slp* locus has been shown to possess multiple partially  
800 redundant regulatory elements driving spatially and temporally overlapping expression patterns (Fujioka &  
801 Jaynes 2012). From our own observations, we have found several cases where mutation of a particular gene  
802 causes the *slp* primary stripes to be reduced in intensity, but not abolished (data not shown), suggesting that  
803 regulatory control of these expression domains is redundant at the *trans* level as well as at the *cis* level.  
804 Partially redundant enhancers that drive similar patterns, but are not necessarily subject to the same  
805 regulatory logic, appear to be very common for developmental transcription factors (Cannavò et al. 2015;  
806 Perry et al. 2011; Staller et al. 2015; Wunderlich et al. 2015).

807

808

809 Opa-dependent regulatory interactions pattern the even-numbered parasegment boundaries

810

811 Future parasegment boundaries are positioned essentially by painting a stripe of *en* expression just posterior  
812 to an abutting stripe of *slp* expression (Cadigan et al. 1994b). In the extending germband, instances of this  
813 pattern are separated by stripes of *odd* expression, which prevent the formation of ectopic compartment  
814 boundaries with reverse polarity (Mullen & DiNardo 1995; Jaynes & Fujioka 2004; Meinhardt 1986).

815

816 The odd-numbered parasegment boundaries are pre-patterned by the combination of the “P” stripes of *prd*  
817 and the primary stripes of *slp*, neither of which are Opa-dependent. Current models for the patterning of the  
818 even-numbered parasegment boundaries implicate an early role for the Eve stripes. However, we have shown  
819 that the effect of Eve is likely indirect. Instead, we propose a model whereby the patterning of the even-  
820 numbered parasegment boundaries occurs later, and relies upon Opa-dependent regulatory interactions  
821 (Figure 14).

822

823 It therefore seems that pair-rule patterning is a two stage process. The first stage, characterised by the  
824 absence of Opa, patterns one set of parasegment boundaries. The second stage, characterised by the presence  
825 of Opa and a consequently different regulatory network, patterns the other set of parasegment boundaries.  
826 Each stage uses the same source of positional information (the primary stripes of the pair-rule genes), but  
827 uses different sets of regulatory logic to exploit this information in different ways.

828

829

830 The pair-rule network exhibits general regulatory principles

831

832 By carefully analysing pair-rule gene expression patterns in the light of the experimental literature, we have  
833 clarified our understanding of the regulatory logic responsible for them. In particular, we propose  
834 significantly revised models for the patterning of *odd*, *slp* and *runt*. Because the structure of a regulatory  
835 network determines its dynamics, and its structure is determined by the control logic of its individual  
836 components, these subtleties are not merely developmental genetic stamp-collecting. Our reappraisal of the

837 pair-rule gene network allows us to re-evaluate some long-held views about *Drosophila* blastoderm  
838 patterning.

839

840 Firstly, pair-rule gene interactions are combinatorially regulated by an extrinsic source of temporal  
841 information, something not accounted for by textbook models of the *Drosophila* segmentation cascade. We  
842 have characterised the role of Opa during the 7 stripe to 14 stripe transition, but there may well be other such  
843 signals acting earlier or later. Indeed, context-dependent transcription factor activity appears to be very  
844 common (Stampfel et al. 2015).

845

846 Secondly, our updated model of the pair-rule network is in many ways simpler than previously thought.  
847 While we do introduce the complication of an Opa-dependent network topology, this effectively streamlines  
848 the sub-networks that operate early (phase 2) and late (phase 3). At any one time, each pair-rule gene is only  
849 regulated by two or three other pair-rule genes. We do not see strong evidence for combinatorial interactions  
850 between these inputs (DiNardo & O'Farrell 1987; Baumgartner & Noll 1990; Swantek & Gergen 2004).

851 Instead, pair-rule gene regulatory logic seems invariably to consist of permissive activation by a broadly  
852 expressed factor (or factors) that is overridden by precisely-positioned repressors (Edgar et al. 1986; Weir et  
853 al. 1988). This kind of regulation appears to typify other complex patterning systems, such as the vertebrate  
854 neural tube (Briscoe & Small 2015).

855

856 Finally, pair-rule gene cross-regulation has traditionally been thought of as a mechanism to stabilise and  
857 refine stripe boundaries (e.g. Edgar et al. 1989; Schroeder et al. 2011). Consistent with this function, as well  
858 as with the observed digitisation of gene expression observed at gastrulation (Baumgartner & Noll 1990;  
859 Pisarev et al. 2009), we find that the late network contains a number of mutually repressive interactions  
860 (Eve/Runt, Eve/Slp, Ftz/Slp, Odd/Runt, Odd/Slp, and perhaps Odd/Prd). However, these switch-like  
861 interactions do not appear to characterise the early network. Interestingly, pair-rule gene expression during  
862 cellularisation has been observed to be unexpectedly dynamic (Keränen et al. 2006; Surkova et al. 2008),  
863 something that is notable given the oscillatory expression of pair-rule gene orthologs in short-germ  
864 arthropods (Sarrazin et al. 2012; El-Sherif et al. 2012; Brena & Akam 2013).

865

866

867 Opa activates the earliest phase of segment-polarity gene expression

868

869 Genetic dissection of *en* regulation suggests that there are several phases of segment-polarity gene  
870 regulation, each responding to distinct sets of regulatory inputs. Early segment-polarity gene expression is  
871 spatially patterned by pair-rule genes, whereas later expression is maintained by positive feedback loops  
872 within the segment-polarity network that rely on an appropriate prepattern being present (DiNardo et al.  
873 1988; von Dassow et al. 2000). Finally, *en* expression becomes independent of signalling and is instead  
874 dependent upon polycomb repression (Moazed & O'Farrell 1992).

875

876 In *opa* mutant embryos, segment-polarity expression is not observed until mid germband extension (Benedyck  
877 et al. 1994). This delay indicates that Opa acts as an explicit temporal signal regulating the onset of the first  
878 phase of expression. Therefore, activation of segment-polarity gene expression is not merely determined by  
879 the emergence of an appropriate pattern of pair-rule proteins, as in simple models of hierarchical gene  
880 regulation. The necessity for an additional signal had been surmised previously, based on the delayed  
881 appearance of odd-numbered *en* stripes in cells already expressing Eve and Prd (Manoukian & Krause 1993).

882

883 Temporally regulating segment-polarity activation makes good sense from a patterning perspective. Correct  
884 segmentation depends upon the initial expression of segment-polarity genes being precisely positioned,  
885 therefore it is imperative that a regular pair-rule pattern is present before the segment-polarity genes first turn  
886 on. Notably, another temporal signal is deployed to prevent precocious pair-rule gene expression while gap  
887 gene expression is being established. In this case, a ubiquitously-expressed maternal protein, Tramtrack,  
888 represses pair-rule gene expression during early embryogenesis (Harrison & Travers 1990; Read et al. 1992;  
889 Brown & Wu 1993). Thus it appears that both activators and repressors provide extrinsic temporal  
890 information to the *Drosophila* segmentation cascade.

891

892

893 Why do pair-rule genes show a segmental phase of expression?

894

895 *prd*, *odd*, *slp* and *runt* are expressed in regular segmental stripes after gastrulation. However, mutation of  
896 these genes causes pair-rule defects rather than segment-polarity phenotypes. In the case of *slp*, this has been  
897 shown to be due to redundancy with a paralog, *slp2* (Grossniklaus et al. 1992; Cadigan et al. 1994a). *prd* and  
898 *odd* also have paralogs expressed in segment-polarity patterns (Baumgartner et al. 1987; Hart et al. 1996).  
899 The *prd* paralog, *gsb*, gives a segment-polarity phenotype if mutated, but Prd and Gsb are able to substitute  
900 for each other if expressed under the control of the other gene's regulatory region (Li & Noll 1993; Li & Noll  
901 1994; Xue & Noll 1996). This indicates that the same protein can fulfil both pair-rule and segment-polarity  
902 functions, and that the two roles require different regulation.

903

904 We have shown that the transition to single-segment periodicity is mediated by substantial re-wiring of pair-  
905 rule gene regulatory interactions. Furthermore, we have shown that this rewiring is controlled by the same  
906 signal that activates segment-polarity gene expression. We propose that Opa's main role is to usher in a  
907 “segment-polarity phase” of expression. In several cases, the presence of Opa induces pair-rule genes to  
908 effectively become segment-polarity genes, and these genes then work in concert with other segment-  
909 polarity genes that do not have an earlier, non-segment-polarity function. For example, En protein is  
910 involved in patterning the late expression of *eve*, *odd*, *runt* and *slp* (Harding et al. 1986; Mullen & DiNardo  
911 1995; Klingler & Gergen 1993; Fujioka et al. 2012), while Slp is a critical component of the segment-  
912 polarity network (Cadigan et al. 1994b).

913

914 We envisage that ancestrally, certain genes would have sequentially fulfilled both pair-rule and segment-  
915 polarity functions, employing different regulatory logic in each case. Serendipitous gene duplications would  
916 later allow these roles to be divided between different paralogs, leaving the transient segmental pattern of the  
917 earlier expressed gene as an evolutionary relic. Consistent with this hypothesis, the roles of *prd* and *gsb* seem  
918 to be fulfilled by a single co-ortholog, *pairberry1*, in grasshoppers, with a second gene, *pairberry2*,  
919 expressed redundantly (Davis et al. 2001).

920

921

922 Is the role of Opa conserved?

923



924 In light of our data, it will be interesting to characterise the role of Opa in other arthropod model organisms.  
925 The best studied short-germ insect is the beetle *Tribolium castaneum*, which also exhibits pair-rule  
926 patterning. An RNAi screen of pair-rule gene orthologs reported no segmentation phenotype for *opa* knock-  
927 down, and concluded that *opa* does not function as a pair-rule gene in *Tribolium* (Choe et al. 2006).  
928 However, the authors also state that *opa* knock-down caused high levels of lethality and most embryos did  
929 not complete development, indicating that this conclusion may be premature. In contrast to this study,  
930 iBeetle-Base (Dönitz et al. 2015) reports a segmentation phenotype for *opa* knock-down. The affected  
931 cuticles show a reduced number of segments including the loss of the mesothorax (T2). This could indicate a  
932 pair-rule phenotype in which the even-numbered parasegment boundaries are lost, similar to the situation in  
933 *Drosophila*. If true, this suggests that at least some aspects of the role of Opa are conserved between long-  
934 germ and short-germ segmentation.

935

936

## 937 MATERIAL AND METHODS

938

### 939 *Drosophila* mutants and genetics

940

941 Wild-type embryos were Oregon-R. The pair-rule gene mutations used were *opa*<sup>5</sup> (Bloomington stock no.  
942 5334) and *ftz*<sup>11</sup> (gift of Bénédicte Sanson). These mutations were balanced over *TM6C Sb Tb twi::lacZ*  
943 (Bloomington stock no. 7251) to allow homozygous mutant embryos to be easily distinguished. Embryos  
944 were collected at 25 °C and fixed according to standard procedures.

945

### 946 Double fluorescent *in situ* hybridisation

947

948 Digoxigenin (DIG) and fluorescein (FITC) labelled riboprobes were generated using full-length pair-rule  
949 gene cDNAs from the *Drosophila* gene collection (Stapleton et al. 2002). The *lacZ* cDNA was a gift from  
950 Nan Hu. Double fluorescent *in situ* hybridization was carried out according to the protocol given in  
951 Supplementary file 1. Embryos were simultaneously hybridised with DIG and FITC probes to different pair-  
952 rule genes. Embryos from mutant crosses were additionally hybridised with a DIG probe to *lacZ*. After

953 hybridisation, embryos were incubated in peroxidase-conjugated anti-FITC and alkaline phosphatase (AP)-  
954 conjugated anti-DIG antibodies (Roche, Basel, Switzerland). Tyramide biotin amplification (TSA biotin kit,  
955 Perkin Elmer, Waltham, MA) followed by incubation in streptavidin Alexa Fluor 488 conjugate  
956 (ThermoFisher Scientific, Waltham, MA) was used to visualise the peroxidase signal. A Fast Red reaction  
957 (Fast Red tablets, Kem-En-Tec Diagnostics, Taastrup, Denmark) was subsequently used to visualise the AP  
958 signal. Embryos were mounted in Prolong Gold (ThermoFisher Scientific) before imaging.

959

#### 960 Microscopy and image analysis

961

962 Embryos were imaged on a Leica SP5 Upright confocal microscope, using a 20x objective. Minor brightness  
963 and contrast adjustments were carried out using Fiji (Schindelin et al. 2012; Schneider et al. 2012).

964 Thresholded images were produced using the “Make Binary” option in Fiji.

965

966

#### 967 **ACKNOWLEDGEMENTS**

968 The authors would like to thank all members of the Akam, Weil and Skaer groups, and the Department of  
969 Zoology imaging facility. Mutants were obtained from the Bloomington Stock Centre, and cDNA clones  
970 from the Drosophila Genomics Resource Centre. This work was supported by a BBSRC PhD studentship to  
971 E. Clark.

972

#### 973 **COMPETING INTERESTS**

974 The authors declare that no competing interests exist.

975

#### 976 **SUPPLEMENTARY FILES**

977 Supplementary file 1: *Drosophila* whole mount double fluorescent *in situ* protocol

## REFERENCES

- Akam, M., 1987. The molecular basis for metameric pattern in the *Drosophila* embryo. *Development*, 101(1), pp.1–22.
- Ali, R.G., Bellchambers, H.M. & Arkell, R.M., 2012. Zinc fingers of the cerebellum (*Zic*): Transcription factors and co-factors. *International Journal of Biochemistry and Cell Biology*, 44(11), pp.2065–2068.
- Aruga, J. et al., 1994. A novel zinc finger protein, *zic*, is involved in neurogenesis, especially in the cell lineage of cerebellar granule cells. *Journal of neurochemistry*, 63(5), pp.1880–1890.
- Aruga, J. et al., 2006. A wide-range phylogenetic analysis of *Zic* proteins: Implications for correlations between protein structure conservation and body plan complexity. *Genomics*, 87(6), pp.783–792.
- Balavoine, G., 2014. Segment formation in annelids: Patterns, processes and evolution. *International Journal of Developmental Biology*, 58(6-8), pp.469–483.
- Baumgartner, S. et al., 1987. Structure of two genes at the gooseberry locus related to the paired gene and their spatial expression during *Drosophila* embryogenesis. *Genes & development*, 1(10), pp.1247–1267.
- Baumgartner, S. & Noll, M., 1990. Network of interactions among pair-rule genes regulating paired expression during primordial segmentation of *Drosophila*. *Mechanisms of development*, 33(1), pp.1–18.
- Benedyk, M.J., Mullen, J.R. & DiNardo, S., 1994. Odd-paired: A zinc finger pair-rule protein required for the timely activation of engrailed and wingless in *Drosophila* embryos. *Genes and Development*, 8(1), pp.105–117.
- Bothma, J.P. et al., 2014. Dynamic regulation of *eve* stripe 2 expression reveals transcriptional bursts in living *Drosophila* embryos. *Proceedings of the National Academy of Sciences*, 111(29), pp.10598–10603.
- Bownes, M., 1975. A photographic study of development in the living embryo of *Drosophila melanogaster*. *Journal of embryology and experimental morphology*, 33(3), pp.789–801.
- Brena, C. & Akam, M., 2013. An analysis of segmentation dynamics throughout embryogenesis in the centipede *Strigamia maritima*. *BMC biology*, 11, p.112.
- Briscoe, J. & Small, S., 2015. Morphogen rules: design principles of gradient-mediated embryo patterning. *Development*, 142(23), pp.3996–4009.
- Brown, J.L. & Wu, C., 1993. Repression of *Drosophila* pair-rule segmentation genes by ectopic expression of tramtrack. *Development (Cambridge, England)*, 117(1), pp.45–58.
- Butler, B. a, Soong, J. & Gergen, J.P., 1992. The *Drosophila* segmentation gene *runt* has an extended cis-regulatory region that is required for vital expression at other stages of development. *Mechanisms of development*, 39(1-2), pp.17–28.
- Cadigan, K.M., Grossniklaus, U. & Gehring, W.J., 1994a. Functional redundancy: the respective roles of the two sloppy paired genes in *Drosophila* segmentation. *Proceedings of the National Academy of Sciences of the United States of America*, 91(14), pp.6324–8.
- Cadigan, K.M., Grossniklaus, U. & Gehring, W.J., 1994b. Localized Expression of Sloppy Paired Protein Maintains the Polarity of *Drosophila* Parasegments. *Genes & Development*, 8(8), pp.899–913.
- Campos-Ortega, J.A. & Hartenstein, V., 1985. *The Embryonic Development of Drosophila melanogaster*, Cannavò, E. et al., 2015. Shadow Enhancers Are Pervasive Features of Developmental Regulatory Networks. *Current Biology*, pp.38–51.
- Carroll, S.B., Laughon, a & Thalley, B.S., 1988. Expression, function, and regulation of the hairy segmentation protein in the *Drosophila* embryo. *Genes Dev*, 2(7), pp.883–890.
- Chan, D.W. et al., 2011. *Zic2* synergistically enhances Hedgehog signalling through nuclear retention of Gli1 in cervical cancer cells. *Journal of Pathology*, 225(4), pp.525–534.
- Chintapalli, V.R., Wang, J. & Dow, J. a T., 2007. Using FlyAtlas to identify better *Drosophila melanogaster* models of human disease. *Nature genetics*, 39(6), pp.715–20.
- Chipman, A.D., Arthur, W. & Akam, M., 2004. A double segment periodicity underlies segment generation in centipede development. *Current Biology*, 14(14), pp.1250–1255.
- Choe, C.P., Miller, S.C. & Brown, S.J., 2006. A pair-rule gene circuit defines segments sequentially in the short-germ insect *Tribolium castaneum*. *Proceedings of the National Academy of Sciences of the United States of America*, 103(17), pp.6560–6564.
- Cimbora, D.M. & Sakonju, S., 1995. *Drosophila* midgut morphogenesis requires the function of the segmentation gene *odd-paired*. *Developmental biology*, 169(2), pp.580–595.
- Copeland, J.W. et al., 1996. Patterning of the *Drosophila* embryo by a homeodomain-deleted Ftz polypeptide. *Nature*, 379(6561), pp.162–165.
- Coulter, D.E. et al., 1990. Molecular analysis of *odd-skipped*, a zinc finger encoding segmentation gene with

- a novel pair-rule expression pattern. *Embo J.*, 8(12), pp.3795–3804.
- Coulter, D.E. & Wieschaus, E., 1988. Gene activities and segmental patterning in *Drosophila*: analysis of odd-skipped and pair-rule double mutants. *Genes & Development*, 2(12B), pp.1812–1823.
- Damen, W.G.M., Janssen, R. & Prpic, N.M., 2005. Pair rule gene orthologs in spider segmentation. *Evolution and Development*, 7(6), pp.618–628.
- von Dassow, G. et al., 2000. The segment polarity network is a robust developmental module. *Nature*, 406(6792), pp.188–192.
- Davis, G.K., D'Alessio, J.A. & Patel, N.H., 2005. Pax3/7 genes reveal conservation and divergence in the arthropod segmentation hierarchy. *Developmental Biology*, 285(1), pp.169–184.
- Davis, G.K., Jaramillo, C.A. & Patel, N.H., 2001. Pax group III genes and the evolution of insect pair - rule patterning. *Development*, 128, pp.3445–3458.
- Davis, I. & Ish-Horowicz, D., 1991. Apical localization of pair-rule transcripts requires 3' sequences and limits protein diffusion in the *Drosophila* blastoderm embryo. *Cell*, 67(5), pp.927–40.
- Dearolf, C.R., Topol, J. & Parker, C.S., 1989. Transcriptional control of *Drosophila* fushi tarazu zebra stripe expression. *Genes & development*, 3(3), pp.384–398.
- DiNardo, S. et al., 1988. Two-tiered regulation of spatially patterned engrailed gene expression during *Drosophila* embryogenesis. *Nature*, 332(6165), pp.604–9.
- DiNardo, S. & O'Farrell, P.H., 1987. Establishment and refinement of segmental pattern in the *Drosophila* embryo: spatial control of engrailed expression by pair-rule genes. *Genes & development*, 1(10), pp.1212–1225.
- Dönitz, J. et al., 2015. iBeetle-Base: A database for RNAi phenotypes in the red flour beetle *Tribolium castaneum*. *Nucleic Acids Research*, 43(D1), pp.D720–D725.
- Dubuis, J.O. et al., 2013. Positional information, in bits. *Proceedings of the National Academy of Sciences*, 110(41), pp.16301–16308.
- Edgar, B. a, Odell, G.M. & Schubiger, G., 1989. A genetic switch, based on negative regulation, sharpens stripes in *Drosophila* embryos. *Developmental genetics*, 10(3), pp.124–42.
- Edgar, B.A. et al., 1986. Repression and turnover pattern fushi tarazu RNA in the early *Drosophila* embryo. *Cell*, 47(5), pp.747–754.
- Edgar, B.A., O'Dell, G.M. & Schubiger, G., 1987. Cytoarchitecture and the patterning of fushi-tarazu expression in the *Drosophila* blastoderm. *Genes Dev.*, 1, pp.1226–1237.
- El-Sherif, E., Averof, M. & Brown, S.J., 2012. A segmentation clock operating in blastoderm and germband stages of *Tribolium* development. *Development (Cambridge, England)*, 139(23), pp.4341–4346.
- El-Sherif, E. & Levine, M., 2016. Shadow Enhancers Mediate Dynamic Shifts of Gap Gene Expression in the *Drosophila* Embryo. *Current Biology*, pp.1–6.
- Eroglu, E. et al., 2014. SWI/SNF complex prevents lineage reversion and induces temporal patterning in neural stem cells. *Cell*, 156(6), pp.1259–1273.
- Fowlkes, C.C. et al., 2008. A Quantitative Spatiotemporal Atlas of Gene Expression in the *Drosophila* Blastoderm. *Cell*, 133(2), pp.364–374.
- Frasch, M. et al., 1987. Characterization and localization of the even-skipped protein of *Drosophila*. *The EMBO journal*, 6(3), pp.749–759.
- Frasch, M. et al., 1988. Molecular analysis of even-skipped mutants in *Drosophila* development. *Genes. Deve.*, 2, pp.1824–1838.
- Fujimi, T.J., Hatayama, M. & Aruga, J., 2012. *Xenopus* Zic3 controls notochord and organizer development through suppression of the Wnt/ $\beta$ -catenin signaling pathway. *Developmental Biology*, 361(2), pp.220–231.
- Fujioka, M. et al., 1996. *Drosophila* Paired regulates late even-skipped expression through a composite binding site for the paired domain and the homeodomain. *Development (Cambridge, England)*, 122(9), pp.2697–707.
- Fujioka, M. et al., 2012. Engrailed cooperates directly with Extradenticle and Homothorax on a distinct class of homeodomain binding sites to repress sloppy paired. *Developmental Biology*, 366(2), pp.382–392.
- Fujioka, M. et al., 2002. The repressor activity of Even-skipped is highly conserved, and is sufficient to activate engrailed and to regulate both the spacing and stability of parasegment boundaries. *Development (Cambridge, England)*, 129(19), pp.4411–4421.
- Fujioka, M. & Jaynes, J.B., 2012. Regulation of a duplicated locus: *Drosophila* sloppy paired is replete with functionally overlapping enhancers. *Developmental Biology*, 362(2), pp.309–319.
- Fujioka, M., Jaynes, J.B. & Goto, T., 1995. Early even-skipped stripes act as morphogenetic gradients at the single cell level to establish engrailed expression. *Development*, 121(12), pp.4371–4382.

- Gergen, J.P. & Butler, B. a., 1988. Isolation of the *Drosophila* segmentation gene *runt* and analysis of its expression during embryogenesis. *Genes & development*, 2(9), pp.1179–1193.
- Goldstein, R.E. et al., 2005. An eh1-Like Motif in Odd-skipped Mediates Recruitment of Groucho and Repression In Vivo. *Molecular and cellular biology*, 25(24), pp.10711–10720.
- Goto, T., Macdonald, P. & Maniatis, T., 1989. Early and late periodic patterns of even skipped expression are controlled by distinct regulatory elements that respond to different spatial cues. *Cell*, 57(3), pp.413–422.
- Graham, A. et al., 2014. What can vertebrates tell us about segmentation? *EvoDevo*, 5(1), p.24.
- Green, J. & Akam, M., 2013. Evolution of the pair rule gene network: Insights from a centipede. *Developmental Biology*, 382(1), pp.235–245.
- Grimm, O., Coppey, M. & Wieschaus, E., 2010. Modelling the Bicoid gradient. *Development (Cambridge, England)*, 137(14), pp.2253–2264.
- Grossniklaus, U., Pearson, R.K. & Gehring, W.J., 1992. The *Drosophila* Sloppy Paired Locus Encodes Two Proteins Involved in Segmentation That Show Homology To Mammalian Transcription Factors. *Genes & Development*, 6(6), pp.1030–1051.
- Gutjahr, T. et al., 1994. Multiple regulatory elements direct the complex expression pattern of the *Drosophila* segmentation gene *paired*. *Mechanisms of Development*, 48(2), pp.119–128.
- Hafen, E., Kuroiwa, A. & Gehring, W.J., 1984. Spatial distribution of transcripts from the segmentation gene *fushi tarazu* during *Drosophila* embryonic development. *Cell*, 37(3), pp.833–841.
- Hannibal, R.L. & Patel, N.H., 2013. What is a segment? *EvoDevo*, 4(1), p.35.
- Harding, K. et al., 1989. Autoregulatory and gap gene response elements of the even-skipped promoter of *Drosophila*. *The EMBO journal*, 8(4), pp.1205–12.
- Harding, K. et al., 1986. Cross-regulatory interactions among pair-rule genes in *Drosophila*. *Science*, 233(4767), pp.953–959.
- Harrison, S.D. & Travers, A.A., 1990. The tramtrack gene encodes a *Drosophila* finger protein that interacts with the *ftz* transcriptional regulatory region and shows a novel embryonic expression pattern. *The EMBO journal*, 9(1), pp.207–16.
- Hart, M.C., Wang, L. & Coulter, D.E., 1996. Comparison of the Structure and Expression of odd-skipped and Two Related Genes That Encode a New Family of Zinc Finger Proteins in *Drosophila*. *Genetics*, 144(1), pp.171–82.
- Hiromi, Y. & Gehring, W.J., 1987. Regulation and Function of the *Drosophila* Segmentation Gene *Fushi-Tarazu*. *Cell*, 50(6), pp.963–974.
- Hiromi, Y., Kuroiwa, A. & Gehring, W.J., 1985. Control elements of the *Drosophila* segmentation gene *fushi tarazu*. *Cell*, 43, pp.603–613.
- Houtmeyers, R. et al., 2013. The ZIC gene family encodes multi-functional proteins essential for patterning and morphogenesis. *Cellular and Molecular Life Sciences*, 70(20), pp.3791–3811.
- Ingham, P. & Gergen, P., 1988. Interactions between the pair-rule genes *runt*, *hairy*, even-skipped and *fushi tarazu* and the establishment of periodic pattern in the *Drosophila* embryo. *Development*, 104(Supplement), pp.51–60.
- Ingham, P., Howard, K. & Ish-Horowicz, D., 1985. Transcription pattern of the *Drosophila* segmentation gene *hairy*. *Nature*, 318(14), pp.162–163.
- Ingham, P. & Pinchin, S., 1985. Genetic analysis of the *hairy* locus in *Drosophila melanogaster*. *Genetics*, pp.463–486.
- Ingham, P.W., Baker, N.E. & Martinez-Arias, a, 1988. Regulation of segment polarity genes in the *Drosophila* blastoderm by *fushi tarazu* and even skipped. *Nature*, 331(6151), pp.73–75.
- Ish-Horowicz, D. & Pinchin, S.M., 1987. Pattern abnormalities induced by ectopic expression of the *Drosophila* gene *hairy* are associated with repression of *ftz* transcription. *Cell*, 51(3), pp.405–15.
- Jaeger, J. et al., 2004. Dynamic control of positional information in the early *Drosophila* embryo. TL - 430. *Nature*, 430 VN - (6997), pp.368–371.
- Jaeger, J., 2009. Modelling the *Drosophila* embryo. *Molecular BioSystems*, 5(12), pp.1549–1568.
- Jaeger, J., 2011. The gap gene network. *Cellular and Molecular Life Sciences*, 68(2), pp.243–274.
- Janssen, R. & Budd, G.E., 2013. Deciphering the onychophoran “segmentation gene cascade”: Gene expression reveals limited involvement of pair rule gene orthologs in segmentation, but a highly conserved segment polarity gene network. *Developmental Biology*, 382(1), pp.224–234.
- Jaynes, J.B. & Fujioka, M., 2004. Drawing lines in the sand: even skipped et al. and parasegment boundaries. *Developmental biology*, 269(2), pp.609–22.
- Jiang, J., Hoey, T. & Levine, M., 1991. Autoregulation of a segmentation gene in *Drosophila*: combinatorial



- interaction of the even-skipped homeo box protein with a distal enhancer element. *Genes & development*, 5(2), pp.265–277.
- Jiménez, G., Pinchin, S.M. & Ish-Horowicz, D., 1996. In vivo interactions of the Drosophila Hairy and Runt transcriptional repressors with target promoters. *The EMBO journal*, 15(24), pp.7088–98.
- Jürgens, G. et al., 1984. Mutations affecting the pattern of the larval cuticle in Drosophila melanogaster II. Zygotic loci on the third chromosome. *Wilhelm Roux's Archives of Developmental Biology*, 193, pp.283–295.
- Keränen, S.V.E. et al., 2006. Three-dimensional morphology and gene expression in the Drosophila blastoderm at cellular resolution II: dynamics. *Genome biology*, 7(12), p.R124.
- Kilchherr, F. et al., 1986. Isolation of the paired gene of Drosophila and its spatial expression during early embryogenesis. , 321, pp.493–499.
- Klingler, M. et al., 1996. Disperse versus compact elements for the regulation of runt stripes in Drosophila. *Developmental biology*, 177(1), pp.73–84.
- Klingler, M. & Gergen, J.P., 1993. Regulation of runt transcription by Drosophila segmentation genes. *Mechanisms of development*, 43(1), pp.3–19.
- Koyabu, Y. et al., 2001. Physical and Functional Interactions between Zic and Gli Proteins. *Journal of Biological Chemistry*, 276(10), pp.6889–6892.
- Kuhn, D.T. et al., 2000. Pair-rule genes cooperate to activate en stripe 15 and refine its margins during germ band elongation in the D. melanogaster embryo. *Mechanisms of Development*, 95(1-2), pp.297–300.
- Lacalli, T.C., 1990. Modeling the Drosophila pair-rule pattern by reaction-diffusion: Gap input and pattern control in a 4-morphogen system. *Journal of Theoretical Biology*, 144(2), pp.171–194.
- Layden, M.J. et al., 2010. Expression and phylogenetic analysis of the zic gene family in the evolution and development of metazoans. *EvoDevo*, 1(1), p.12.
- Lee, H., Stultz, B.G. & Hursh, D.A., 2007. The Zic family member, odd-paired, regulates the Drosophila BMP, decapentaplegic, during adult head development. *Development (Cambridge, England)*, 134(7), pp.1301–1310.
- Li, X. & Noll, M., 1994. Evolution of distinct developmental functions of three Drosophila genes by acquisition of different cis-regulatory regions. *Nature*, 367(6458), pp.83–87.
- Li, X. & Noll, M., 1993. Role of the gooseberry gene in Drosophila embryos: maintenance of wingless expression by a wingless--gooseberry autoregulatory loop. *The EMBO journal*, 12(12), pp.4499–509.
- Little, S.C., Tikhonov, M. & Gregor, T., 2013. Precise developmental gene expression arises from globally stochastic transcriptional activity. *Cell*, 154(4), pp.789–800.
- Liu, P.Z. & Kaufman, T.C., 2005. Short and long germ segmentation: Unanswered questions in the evolution of a developmental mode. *Evolution and Development*, 7(6), pp.629–646.
- Lu, X. et al., 2009. Coupling of zygotic transcription to mitotic control at the Drosophila mid-blastula transition. *Development (Cambridge, England)*, 136, pp.2101–2110.
- Luo, Z. et al., 2015. Zic2 is an enhancer-binding factor required for embryonic stem cell specification. *Molecular Cell*, 57(4), pp.685–694.
- Macdonald, P.M., Ingham, P. & Struhl, G., 1986. Isolation, structure, and expression of even-skipped: a second pair-rule gene of Drosophila containing a homeo box. *Cell*, 47(5), pp.721–734.
- Manoukian, A.S. & Krause, H.M., 1992. Concentration-dependent activities of the even-skipped protein in Drosophila embryos. *Genes & Development*, 6(9), pp.1740–1751.
- Manoukian, A.S. & Krause, H.M., 1993. Control of segmental asymmetry in Drosophila embryos. *Development*, 118, pp.785–796.
- Martinez-Arias, A. & Lawrence, P.A., 1985. Parasegments and compartments in the Drosophila embryo. *Nature*, 313(6004), pp.639–642.
- Meinhardt, H., 1986. Hierarchical inductions of cell states: a model for segmentation in Drosophila. *Journal of cell science. Supplement*, 4, pp.357–81.
- Merzdorf, C.S., 2007. Emerging roles for zic genes in early development. *Developmental Dynamics*, 236(4), pp.922–940.
- Moazed, D. & O'Farrell, P.H., 1992. Maintenance of the engrailed expression pattern by Polycomb group genes in Drosophila. *Development (Cambridge, England)*, 116(3), pp.805–810.
- Morrissey, D. et al., 1991. Functional dissection of the paired segmentation gene in Drosophila embryos. *Genes and Development*, 5(9), pp.1684–1696.
- Mullen, J.R. & DiNardo, S., 1995. Establishing parasegments in Drosophila embryos: roles of the odd-skipped and naked genes. *Developmental biology*, 169(1), pp.295–308.
- Murgan, S. et al., 2015. Atypical Transcriptional Activation by TCF via a Zic Transcription Factor in C.

- elegans Neuronal Precursors. *Developmental Cell*, 33(6), pp.737–745.
- Nasiadka, a & Krause, H.M., 1999. Kinetic analysis of segmentation gene interactions in *Drosophila* embryos. *Development (Cambridge, England)*, 126(7), pp.1515–1526.
- Nüsslein-Volhard, C. & Wieschaus, E., 1980. Mutations affecting segment number and polarity in *Drosophila*. *Nature*, 287(5785), pp.795–801.
- Pankratz, M.J. & Jackle, H., 1990. Making stripes in the *Drosophila* embryo. *Trends in Genetics*, 6(9), pp.287–292.
- Patel, N.H., Condrón, B.G. & Zinn, K., 1994. Pair-rule expression patterns of even-skipped are found in both short- and long-germ beetles. *Nature*, 367(6462), pp.429–434.
- Peel, A.D., Chipman, A.D. & Akam, M., 2005. Arthropod segmentation: beyond the *Drosophila* paradigm. *Nature Reviews Genetics*, 6(12), pp.905–16.
- Perry, M.W., Boettiger, A.N. & Levine, M., 2011. Multiple enhancers ensure precision of gap gene-expression patterns in the *Drosophila* embryo. *Pnas*, 108(33), pp.1–12.
- Pisarev, A. et al., 2009. FlyEx, the quantitative atlas on segmentation gene expression at cellular resolution. *Nucleic Acids Research*, 37(SUPPL. 1), pp.560–566.
- Pourelbrahim, R. et al., 2011. Transcription factor Zic2 inhibits Wnt/ $\beta$ -catenin protein signaling. *Journal of Biological Chemistry*, 286(43), pp.37732–37740.
- Prazak, L., Fujioka, M. & Gergen, J.P., 2010. Non-additive interactions involving two distinct elements mediate sloppy-paired regulation by pair-rule transcription factors. *Developmental Biology*, 344(2), pp.1048–1059.
- Pueyo, J.I., Lanfear, R. & Couso, J.P., 2008. Ancestral Notch-mediated segmentation revealed in the cockroach *Periplaneta americana*. *Proceedings of the National Academy of Sciences of the United States of America*, 105(43), pp.16614–16619.
- Quinn, M.E., Haaning, A. & Ware, S.M., 2012. Preaxial polydactyly caused by Gli3 haploinsufficiency is rescued by Zic3 loss of function in mice. *Human Molecular Genetics*, 21(8), pp.1888–1896.
- Raj, L. et al., 2000. Targeted localized degradation of Paired protein in *Drosophila* development. *Current biology : CB*, 10(20), pp.1265–1272.
- Read, D., Levine, M. & Manley, J.L., 1992. Ectopic expression of the *Drosophila* tramtrack gene results in multiple embryonic defects, including repression of even-skipped and fushi tarazu. *Mechanisms of Development*, 38(3), pp.183–195.
- Riechmann, V. et al., 1997. Control of cell fates and segmentation in the *Drosophila* mesoderm. *Development (Cambridge, England)*, 124(15), pp.2915–22.
- Sackerson, C., Fujioka, M. & Goto, T., 1999. The even-skipped locus is contained in a 16-kb chromatin domain. *Developmental biology*, 211(1), pp.39–52.
- Salero, E. et al., 2001. Transcription factors Zic1 and Zic2 bind and transactivate the apolipoprotein E gene promoter. *Journal of Biological Chemistry*, 276(3), pp.1881–1888.
- Sánchez, L. & Thieffry, D., 2003. Segmenting the fly embryo: a logical analysis of the pair-rule cross-regulatory module. *Journal of Theoretical Biology*, 224, pp.517–537.
- Sanson, B., 2001. Generating patterns from fields of cells: Examples from *Drosophila* segmentation. *EMBO Reports*, 2(12), pp.1083–1088.
- Sarrazin, A.F., Peel, A.D. & Averof, M., 2012. A segmentation clock with two-segment periodicity in insects. *Science*, 336(6079), pp.338–341.
- Saulier-Le Dréan, B. et al., 1998. Dynamic changes in the functions of Odd-skipped during early *Drosophila* embryogenesis. *Development (Cambridge, England)*, 125(23), pp.4851–61.
- Schaub, C. & Frasch, M., 2013. Org-1 is required for the diversification of circular visceral muscle founder cells and normal midgut morphogenesis. *Developmental Biology*, 376(2), pp.245–259.
- Schier, A. & Gehring, W., 1992. Direct homeodomain–DNA interaction in the autoregulation of the fushi tarazu gene. *Nature*, 356(6372), pp.804–7.
- Schindelin, J. et al., 2012. Fiji: an open-source platform for biological-image analysis. *Nature methods*, 9(7), pp.676–82.
- Schneider, C. a, Rasband, W.S. & Eliceiri, K.W., 2012. NIH Image to ImageJ: 25 years of image analysis. *Nature Methods*, 9(7), pp.671–675.
- Schroeder, M.D., Greer, C. & Gaul, U., 2011. How to make stripes: deciphering the transition from non-periodic to periodic patterns in *Drosophila* segmentation. *Development*, 138(14), pp.3067–3078.
- Sen, A. et al., 2010. Odd paired transcriptional activation of decapentaplegic in the *Drosophila* eye/antennal disc is cell autonomous but indirect. *Developmental Biology*, 343(1-2), pp.167–177.
- Small, S., Blair, A. & Levine, M., 1992. Regulation of even-skipped stripe 2 in the *Drosophila* embryo. *The*

- EMBO journal*, 11(11), pp.4047–57.
- Small, S., Blair, A. & Levine, M., 1996. Regulation of two pair-rule stripes by a single enhancer in the *Drosophila* embryo. *Developmental biology*, 175(2), pp.314–324.
- Staller, M. V et al., 2015. Shadow enhancers enable Hunchback bifunctionality in the *Drosophila* embryo. *Proceedings of the National Academy of Sciences of the United States of America*, 112(3), pp.785–90.
- Stampfel, G. et al., 2015. Transcriptional regulators form diverse groups with context-dependent regulatory functions. *Nature*, 528(7580), pp.147–51.
- Stapleton, M. et al., 2002. A *Drosophila* full-length cDNA resource. *Genome Biology*, 3(12), p.RESEARCH0080.
- Surkova, S. et al., 2008. Characterization of the *Drosophila* segment determination morphome. *Developmental Biology*, 313(2), pp.844–862.
- Swantek, D. & Gergen, J.P., 2004. Ftz modulates Runt-dependent activation and repression of segment-polarity gene transcription. *Development*, 131(10), pp.2281–2290.
- Telford, M.J. et al., 2008. The origins and evolution of the Ecdysozoa. *Philosophical Transactions of the Royal Society B*, (January), pp.1529–1537.
- Vavra, S.H. & Carroll, S.B., 1989. The zygotic control of *Drosophila* pair-rule gene expression. II. Spatial repression by gap and pair-rule gene products. *Development*, 107(3), pp.663–672.
- Weir, M.P. et al., 1988. Spatial regulation of engrailed expression in the *Drosophila* embryo. *Genes. Deve.*, 2, pp.1194–1203.
- Winata, C.L., Kondrychyn, I. & Korzh, V., 2015. Changing Faces of Transcriptional Regulation Reflected by Zic3. , (February), pp.117–127.
- Wolff, C. et al., 1999. Structure and evolution of a pair-rule interaction element: runt regulatory sequences in *D. melanogaster* and *D. virilis*. *Mechanisms of Development*, 80(1), pp.87–99.
- Wunderlich, Z. et al., 2015. Krüppel Expression Levels Are Maintained through Compensatory Evolution of Shadow Enhancers. *Cell Reports*, 12(11), pp.1740–1747.
- Xue, L. & Noll, M., 1996. The functional conservation of proteins in evolutionary alleles and the dominant role of enhancers in evolution. *Embo J*, 15(14), pp.3722–3731.
- Yang, Y. et al., 2000. ZIC2 and Sp3 repress Sp1-induced activation of the human D1A dopamine receptor gene. *Journal of Biological Chemistry*, 275(49), pp.38863–38869.



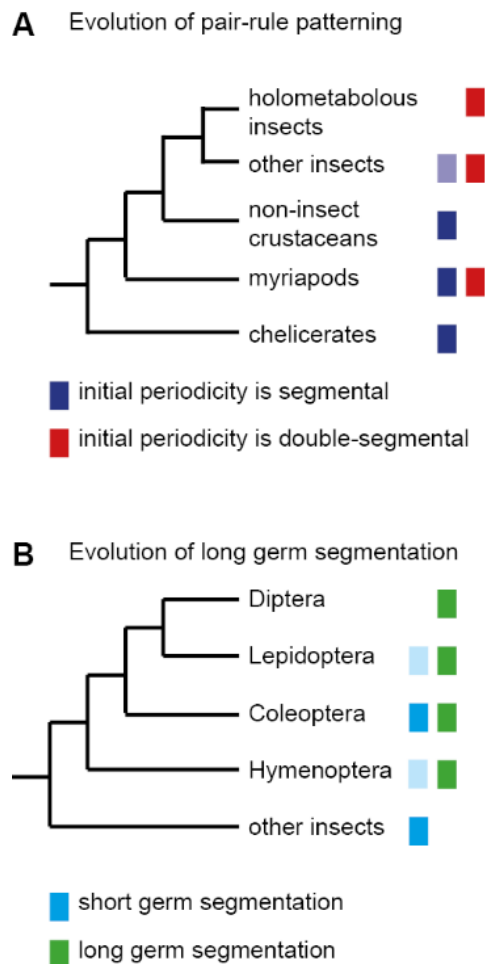

**Figure 1.**  
**The evolution of pair-rule patterning pre-dates the evolution of long germ segmentation.**

(A) Single segment periodicity is ancestral in arthropod segmentation, being found in spiders, millipedes, crustaceans, and some insects (Davis et al. 2005; Pueyo et al. 2008). “Pair-rule” patterning, involving an initial double segment periodicity of pair-rule gene expression, appears to have evolved independently at least twice. It is found in insects and certain centipedes (Davis et al. 2001; Chipman et al. 2004). (B) Long germ segmentation is likely to have independently evolved multiple times within holometabolous insects, from an ancestral short germ state (Liu & Kaufman 2005).

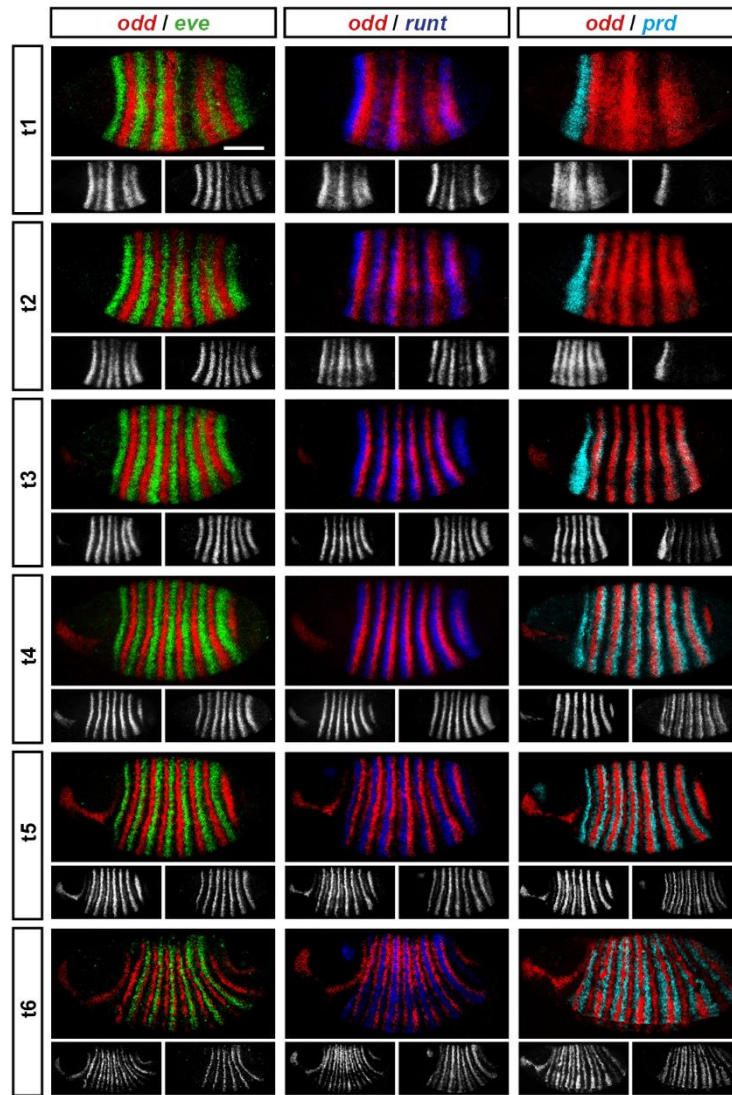

**Figure 2.**

**Representative double fluorescent *in situ* hybridisation data for three combinations of pair-rule genes.**

This figure shows a small subset of our wild-type dataset. Each column represents a different pairwise combination of *in situ* probes, while each row shows similarly-staged embryos of increasing developmental age. All panels show a lateral view, anterior left, dorsal top. Individual channels are shown in grayscale below each double-channel image. For ease of comparison, the signal from each gene is shown in a different colour in the double-channel images. Time classes are arbitrary, meant only to illustrate the progressive stages of pattern maturation between early cellularisation (t1) and late gastrulation (t6). Note that the evolving pattern of *odd* expression in the head provides a distinctive and reliable indicator of embryo age. Scale bar = 100  $\mu$ m. The complete dataset is available from the authors upon request.

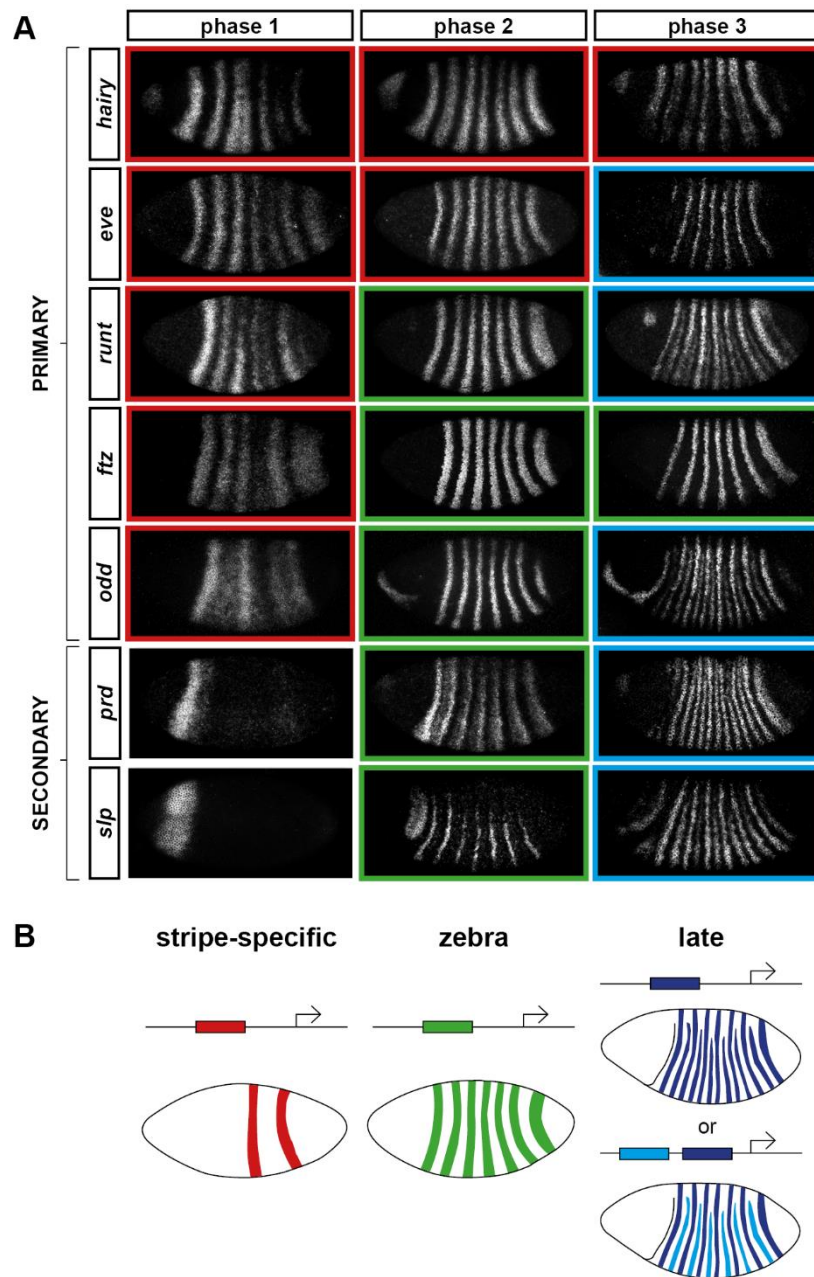

**Figure 3.**

**Three phases of pair-rule gene expression, usually mediated by different classes of regulatory element.**

(A) Representative expression patterns of each of the seven pair-rule genes at phase 1 (early cellularisation), phase 2 (mid cellularisation), and phase 3 (gastrulation). Pair-rule genes are classified as “primary” or “secondary” based on their regulation and expression during phase 1 (see text). All panels show a lateral view, anterior left, dorsal top. Note that the cephalic furrow may obscure certain anterior stripes during phase 3. (B) Illustrative diagrams of the different kinds of regulatory elements mediating pair-rule gene expression. “Stripe-specific” elements are regulated by gap genes and give rise to either one or two stripes each. “Zebra” elements are regulated by pair-rule genes and give rise to seven stripes. “Late” expression patterns may be generated by a single element generating segmental stripes, or by a combination of two elements each generating a distinct pair-rule pattern. The coloured outlines around the panels in (A) correspond to the colours of the different classes of regulatory elements in (B), and indicate how each phase of expression is regulated for the trunk stripes of each pair-rule gene.

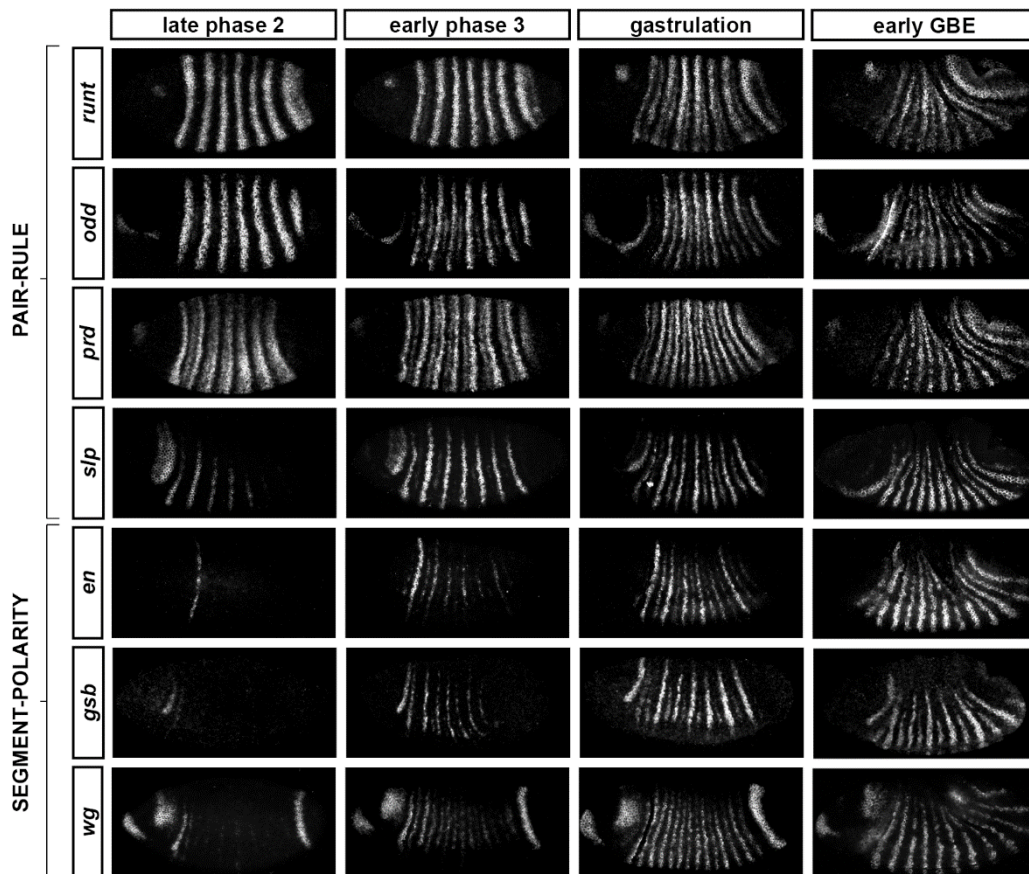

**Figure 4**

**Frequency-doubling of pair-rule gene expression patterns is almost simultaneous, and coincides with the first expression of the segment-polarity genes.**

Each row shows the expression of a particular pair-rule gene or segment-polarity gene, while each column represents a particular developmental timepoint. Late phase 2 and early phase 3 both correspond to late Bownes stage 5; gastrulation is Bownes stage 6, and early germband extension is Bownes stage 7 (Bownes 1975; Campos-Ortega & Hartenstein 1985). All panels show a lateral view, anterior left, dorsal top. GBE = germband extension. The figure represents about 20 minutes of development at 25° C.



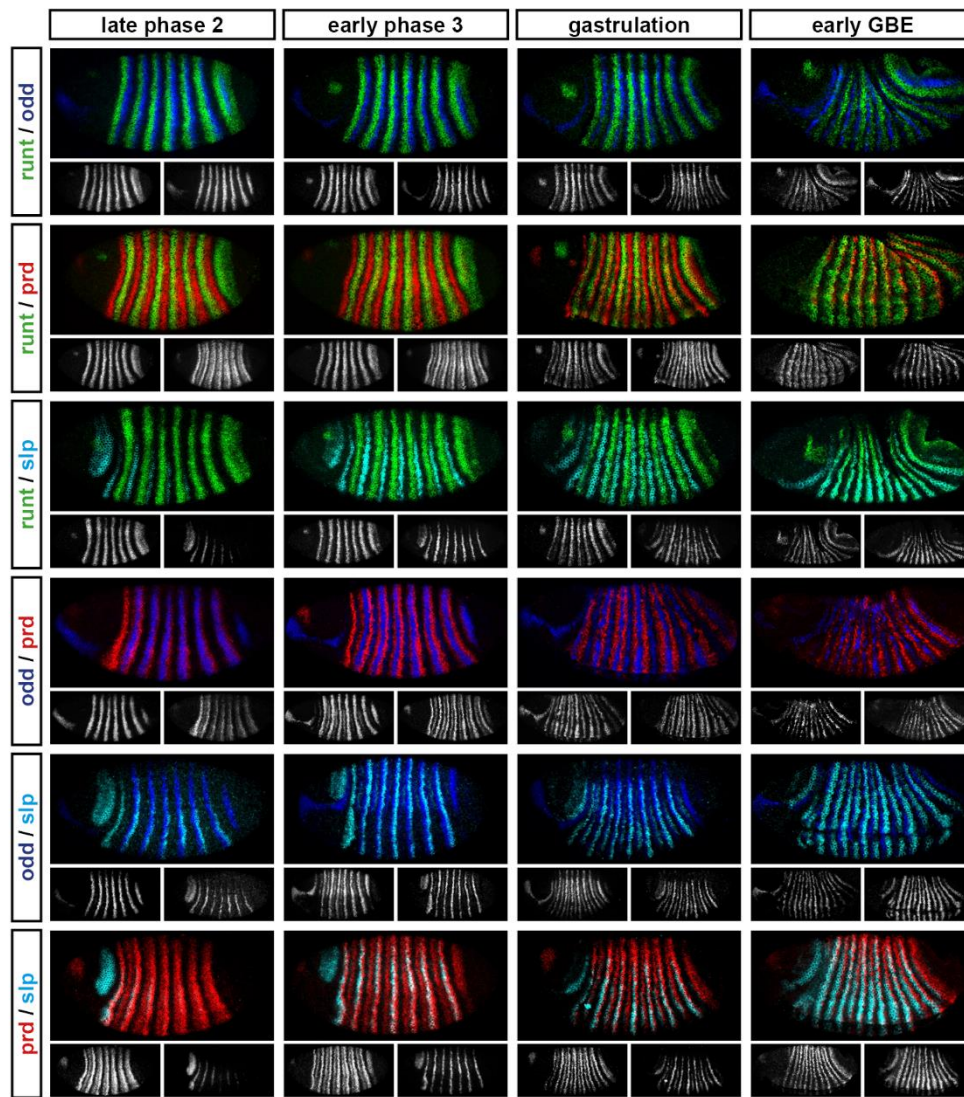

**Figure 4–figure supplement 1**  
**Relative expression of pair-rule genes during frequency-doubling.**

Each row shows the relative expression of two pair-rule genes, while each column represents a particular developmental timepoint. Late phase 2 and early phase 3 both correspond to late Bownes stage 5; gastrulation is Bownes stage 6, and early germband extension is Bownes stage 7 (Bownes 1975; Campos-Ortega & Hartenstein 1985). All panels show lateral or ventrolateral views, anterior left, dorsal top. Single channel images are shown in greyscale below each double channel image (the channel listed first in the row label is always on the left). Each gene is shown as a different colour in the double-channel images. GBE = germband extension.

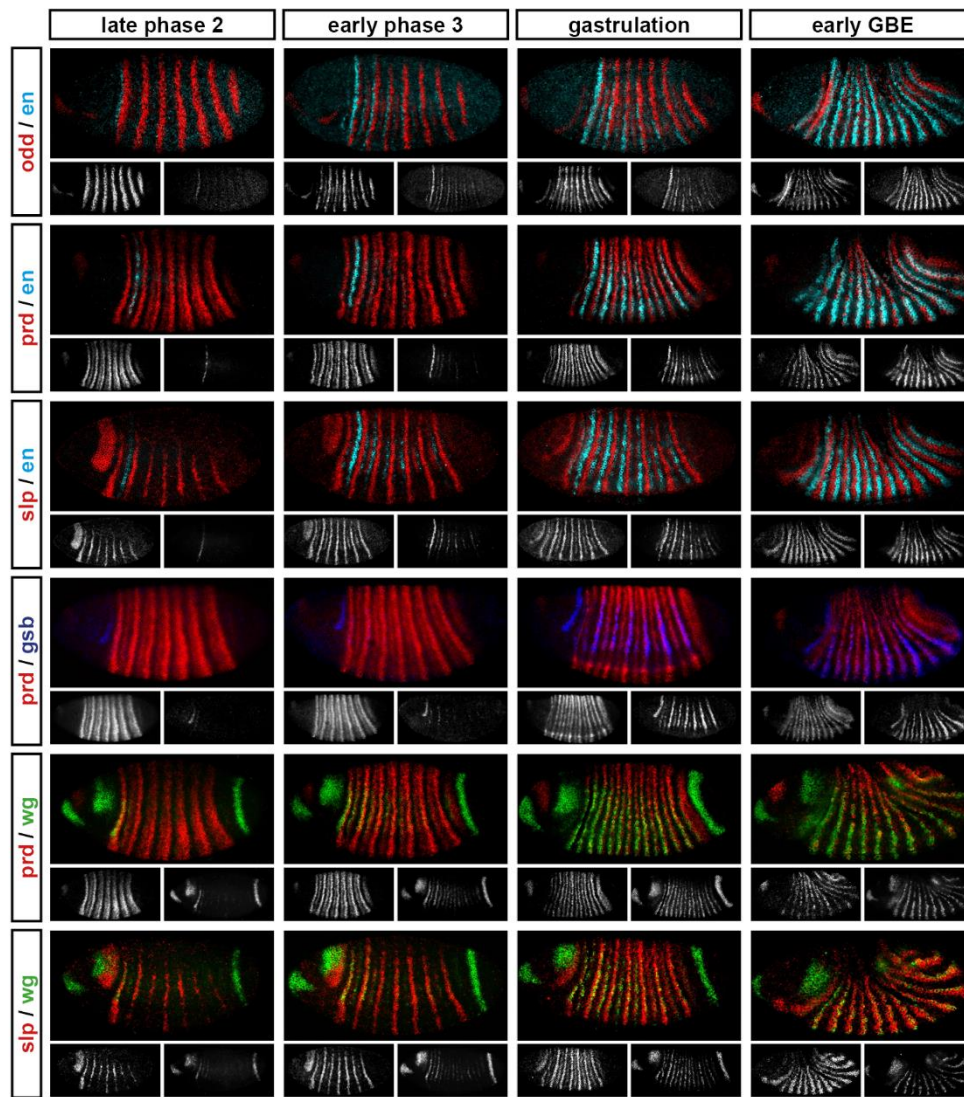

**Figure 4–figure supplement 2**

**Relative expression of segment-polarity genes and pair-rule genes during frequency-doubling.**

Each row shows the relative expression of a particular pair-rule gene and segment-polarity gene combination, while each column represents a particular developmental timepoint. Late phase 2 and early phase 3 both correspond to late Bownes stage 5; gastrulation is Bownes stage 6, and early germband extension is Bownes stage 7 (Bownes 1975; Campos-Ortega & Hartenstein 1985). All panels show a lateral view, anterior left, dorsal top. Single channel images are shown in greyscale below each double channel image (the channel listed first in the row label is always on the left). Each segment-polarity gene is shown in a different colour, while pair-rule gene expression is shown in red. GBE = germband extension.

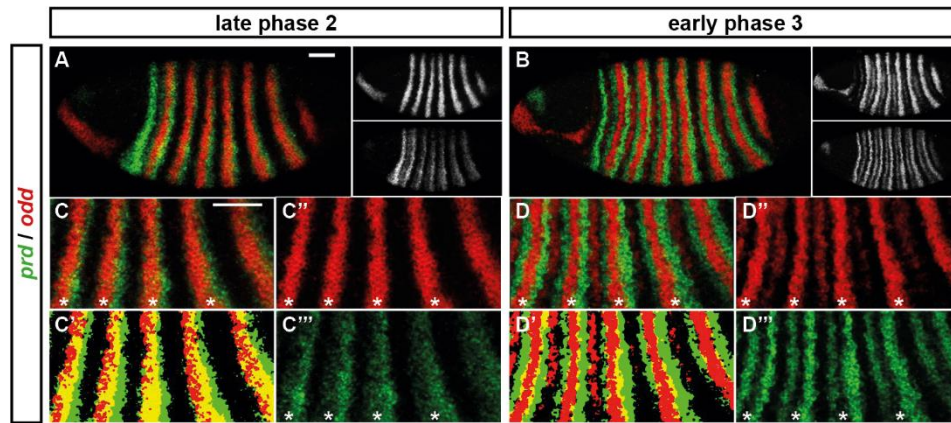

**Figure 5**  
**Regulation of *prd* transcription at phase 2 versus phase 3.**

Relative expression of *prd* and *odd* is shown in a late phase 2 embryo (just prior to frequency doubling) and an early phase 3 embryo (showing the first signs of frequency doubling). (**A**, **B**) Whole embryos, lateral view, anterior left, dorsal top. Individual channels are shown to the right of each double channel image, in the same vertical order as the panel label. (**C**, **D**) Blow-ups of expression in stripes 2-6; asterisks mark the location of *odd* primary stripes. Thresholded images (**C'**, **D'**) highlight regions of overlapping expression (yellow pixels). Considerable overlap between *prd* and *odd* expression is observed at phase 2 but not at phase 3. Scale bars = 50  $\mu$ m.



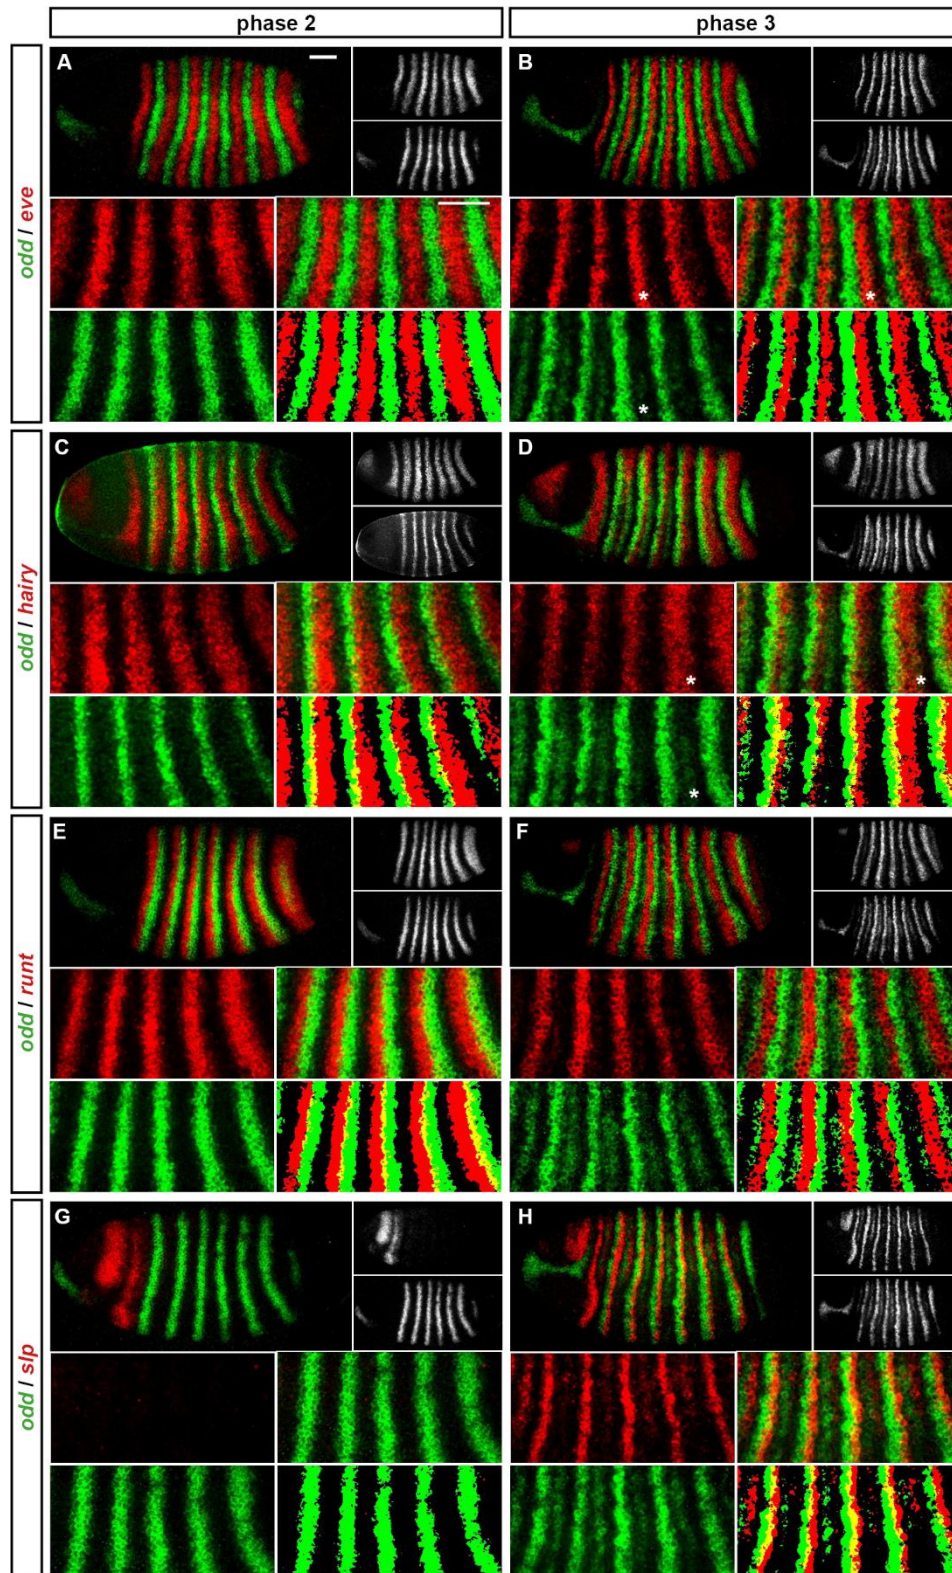



**Figure 6**  
**Expression of *odd* at phase 2 versus phase 3.**

Relative expression of *odd* and other pair-rule genes (**A, B** – *eve*; **C, D** – *hairy*; **E, F** – *runt*; **G, H** – *slp*) is shown in late phase 2 embryos (**A, C, E, G**) and in early phase 3 embryos (**B, D, F, H**). Individual channels are shown to the right of each whole embryo double channel image (*odd* bottom, other gene top). Other panels show blow-ups of expression in stripes 2-6 (individual channels, double channel image, and thresholded double channel image). *odd* expression is always shown in green. *odd* expression overlaps with *eve* and *hairy* at phase 3 (e.g. asterisks marking nascent secondary stripe expression in **B, D**) but not at phase 2 (**A, C**). *odd* expression overlaps with *runt* at phase 2 (**E**) but not phase 3 (**F**). *slp* expression is absent for most of phase 2 (**G**) and is responsible for posterior narrowing of odd primary stripes at phase 3 (**H**). Scale bars = 50  $\mu$ m. See text for details.

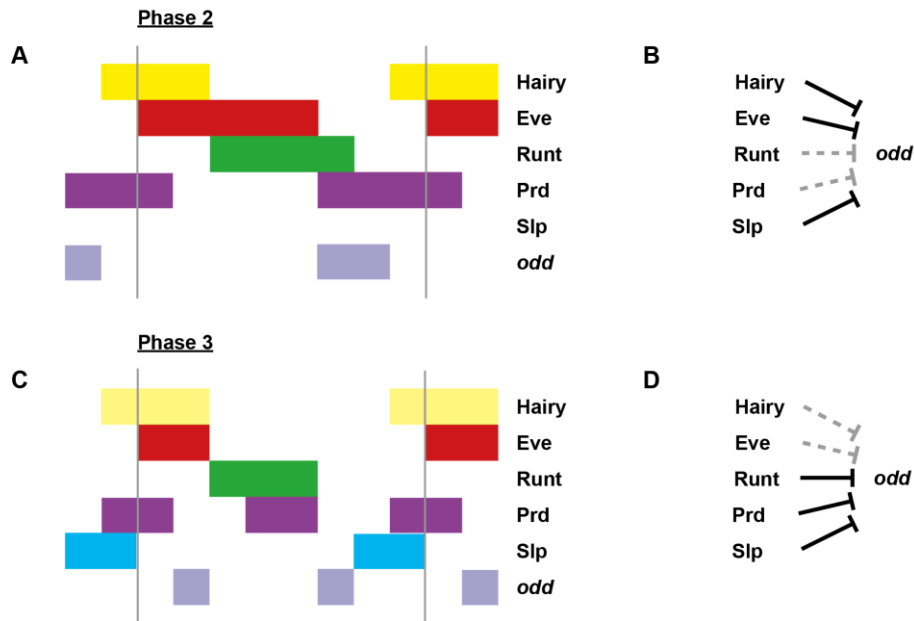

**Figure 6–figure supplement 1**  
**Model for the regulation of *odd* transcription at phase 2 versus phase 3.**

Model for the differential regulation of *odd* expression by pair-rule proteins at late phase 2 (**A, B**) versus mid phase 3 (**C, D**). (**A, C**) Schematic diagrams showing the expression of *odd* relative to potential regulators. The horizontal axis represents an idealised portion of the AP axis (~12 nuclei across). The grey vertical lines demarcate a double parasegment repeat (~8 nuclei across). Lighter yellow in (**C**) represents fading Hairy expression. (**B, D**) Inferred regulatory interactions. Hammerhead arrows represent repressive interactions. Solid black arrows represent interactions that are currently in operation; dashed grey arrows represent those that are not. At each stage, *odd* is expressed only where its current repressors are absent. See Figure 5 and Figure 6 for staged relative expression data. Note that the expression patterns of potential regulators diagrammed in this figure represent protein distributions, which often differ slightly from transcript distributions due to time delays inherent in protein synthesis and decay (see Figure 9).

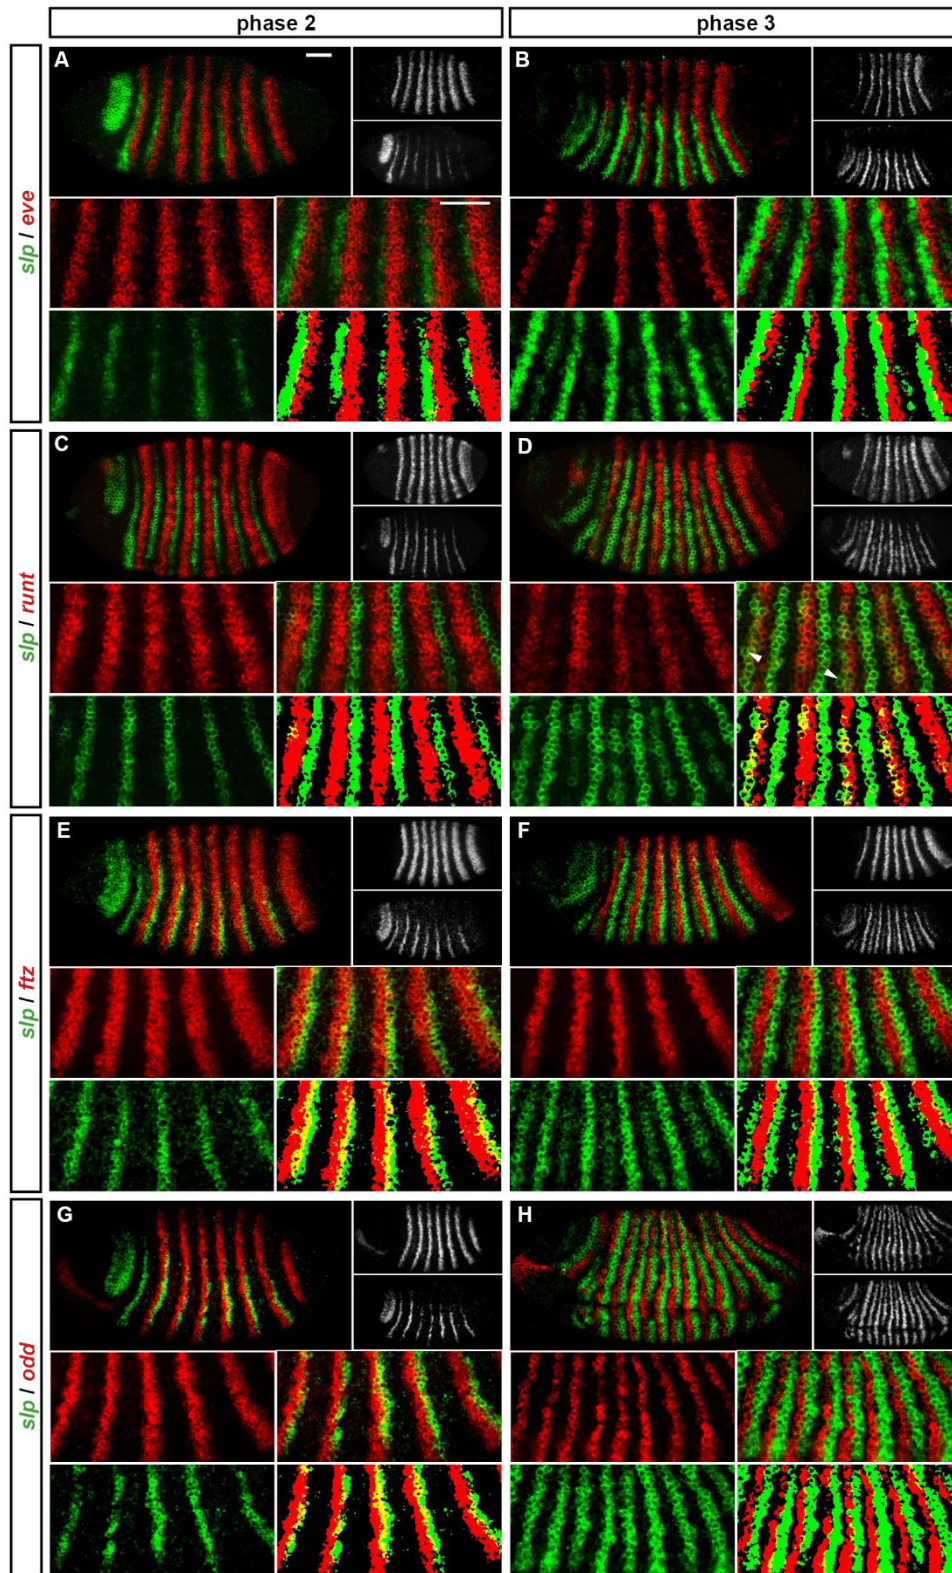

**Figure 7**  
**Expression of *slp* at phase 2 versus phase 3.**

Relative expression of *slp* and other pair-rule genes (**A, B** – *eve*; **C, D** – *runt*; **E, F** – *ftz*; **G, H** – *odd*) is shown in late phase 2 embryos (**A, C, E, G**) and in early phase 3 embryos (**B, D, F, H**). Individual channels are shown to the right of each whole embryo double channel image (*slp* bottom, other gene top). Other panels show blow-ups of expression in stripes 2-6 (individual channels, double channel image, and thresholded double channel image). *slp* expression is always shown in green. *slp* expression overlaps with *runt* at phase 3 (**D**) but not at phase 2 (**C**). *slp* expression overlaps with *ftz* and *odd* at phase 2 (**E, G**) but not phase 3 (**F, H**). *slp* expression never overlaps with *eve* (**A, B**). Arrowheads in (**D**) indicate cells where *slp* secondary stripe expression does not coincide with *runt* expression. Scale bars = 50  $\mu$ m. See text for details.

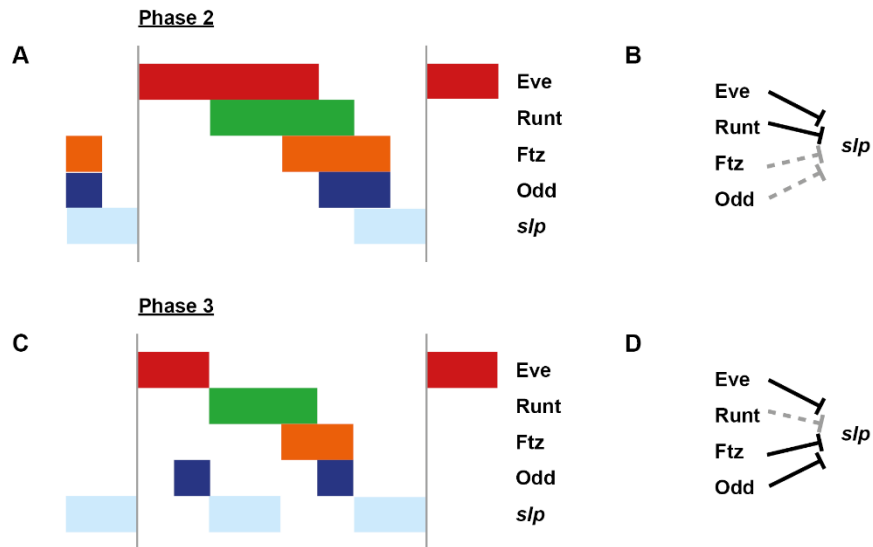

**Figure 7–figure supplement 1**  
**Model for the regulation of *slp* transcription at phase 2 versus phase 3.**

Model for the differential regulation of *slp* expression by pair-rule proteins at late phase 2 (**A, B**) versus mid phase 3 (**C, D**). (**A, C**) Schematic diagrams showing the expression of *slp* relative to potential regulators. The horizontal axis represents an idealised portion of the AP axis (~12 nuclei across). The grey vertical lines demarcate a double parasegment repeat (~8 nuclei across). (**B, D**) Inferred regulatory interactions. Hammerhead arrows represent repressive interactions. Solid black arrows represent interactions that are currently in operation; dashed grey arrows represent those that are not. At each stage, *slp* is expressed only where its current repressors are absent. See Figure 7 for staged relative expression data. Note that the expression patterns of potential regulators diagrammed in this figure represent protein distributions, which often differ slightly from transcript distributions due to time delays inherent in protein synthesis and decay (see Figure 9).

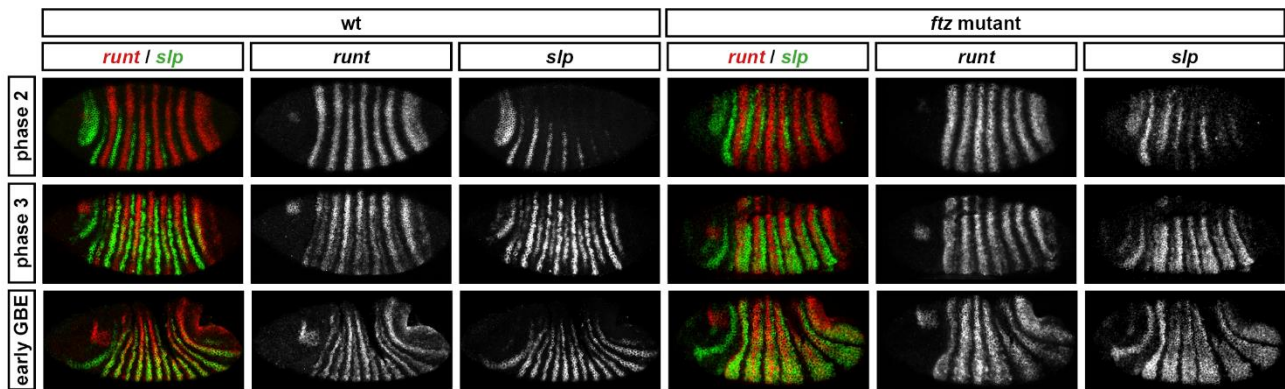

### Figure 7–figure supplement 2

#### **Runt represses *slp* during phase 2 in both wild-type and *ftz* mutant embryos**

Relative expression of *runt* and *slp* in wild-type and *ftz* mutant embryos. In both cases, co-expression of *runt* and *slp* is not seen until phase 3. Individual channels are shown to the right of each double-channel image. All panels show a lateral view, anterior left, dorsal top.



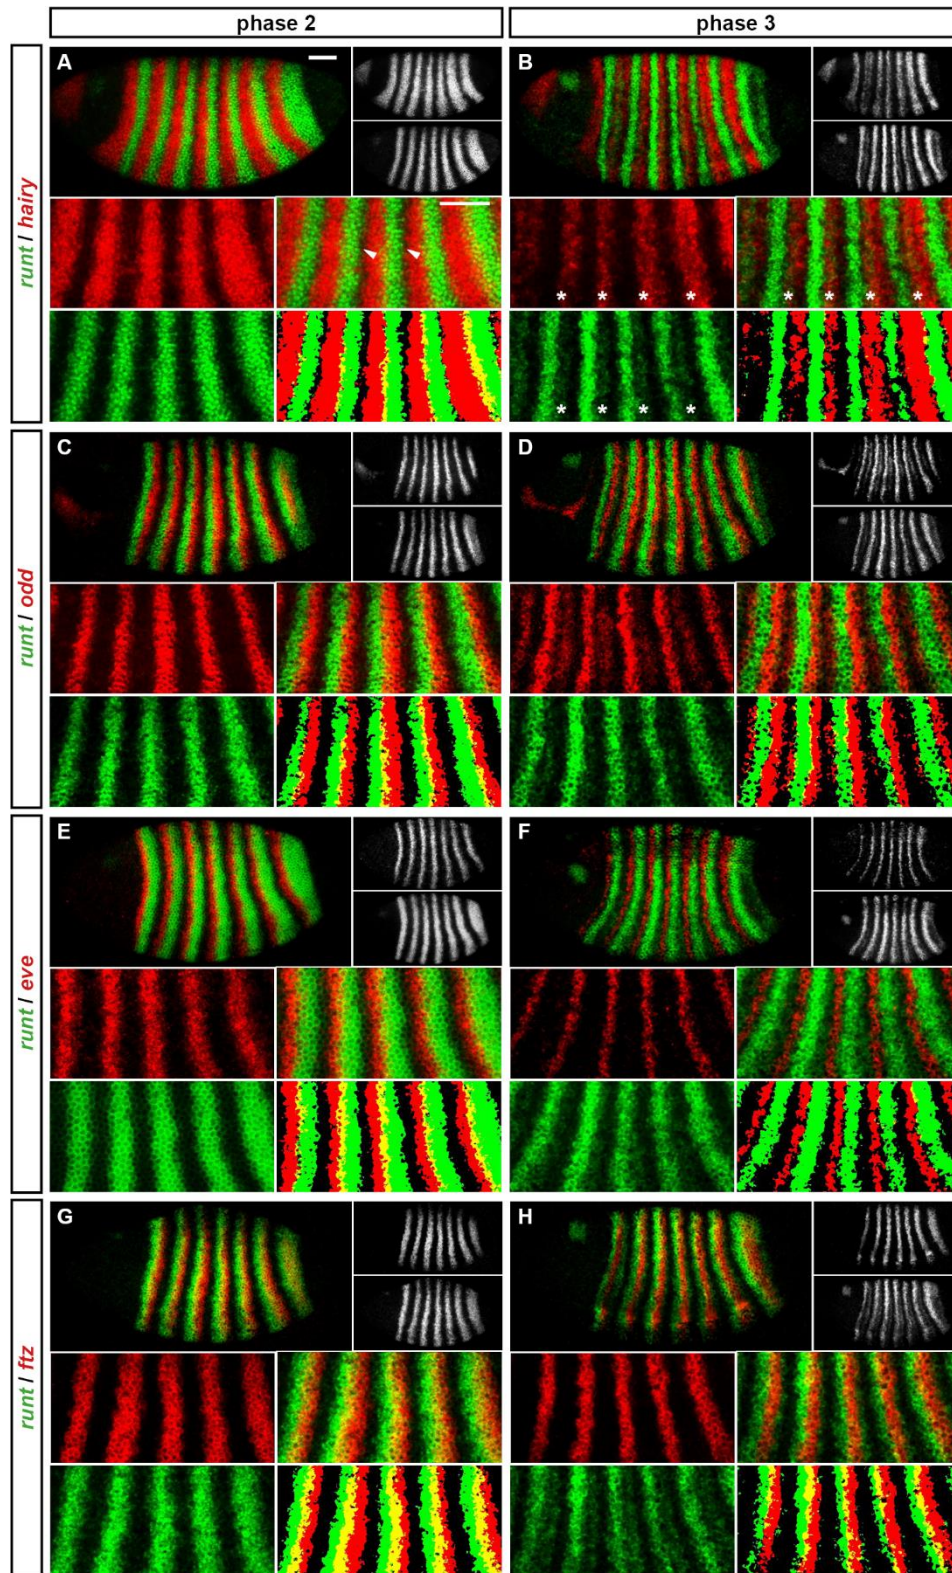

**Figure 8**  
**Expression of *runt* at phase 2 versus phase 3.**

Relative expression of *runt* and other pair-rule genes (**A, B** – *hairy*; **C, D** – *odd*; **E, F** – *eve*; **G, H** – *ftz*) is shown in late phase 2 embryos (**A, C, E, G**) and in early phase 3 embryos (**B, D, F, H**). Individual channels are shown to the right of each whole embryo double channel image (*runt* bottom, other gene top). Other panels show blow-ups of expression in stripes 2-6 (individual channels, double channel image, and thresholded double channel image). *runt* expression is always shown in green. *runt* primary stripes are out of phase with *hairy* (**A**) but *runt* secondary stripes (asterisks in **B**) emerge within domains of *hairy* expression. *runt* expression overlaps with *odd* and *eve* at phase 2 (**C, E**) but not phase 3 (**D, F**). *runt* expression overlaps with *ftz* at both phase 2 and phase 3 (**G, H**). Arrowheads in (**A**) point to clear gaps between the posterior boundaries of the *runt* stripes and the anterior boundaries of the *hairy* stripes. Scale bars = 50  $\mu\text{m}$ . See text for details.



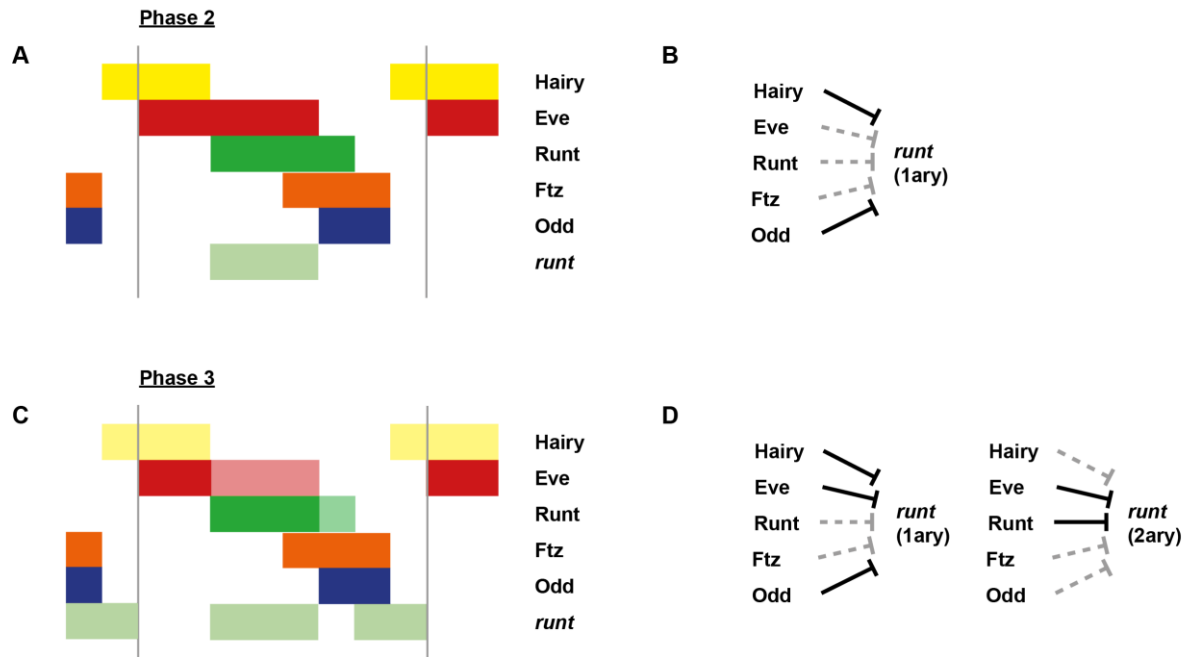

### Figure 8–figure supplement 1

#### Model for the regulation of *runt* transcription at phase 2 versus phase 3.

Model for the differential regulation of *runt* expression by pair-rule proteins at late phase 2 (**A, B**) versus early phase 3 (**C, D**). (**A, C**) Schematic diagrams showing the expression of *runt* relative to potential regulators. The horizontal axis represents an idealised portion of the AP axis (~12 nuclei across). The grey vertical lines demarcate a double parasegment repeat (~8 nuclei across). Lighter red and green sections in (**C**) represent fading Eve and Runt protein. (**B, D**) Inferred regulatory interactions. Separate regulatory logic is shown for the expression of the primary (1ary) stripes and the secondary (2ary) stripes, because they are driven by separate enhancers (see text for details). Hammerhead arrows represent repressive interactions. Solid black arrows represent interactions that are currently in operation; dashed grey arrows represent those that are not. At each stage, *runt* is expressed only where its current repressors are absent. See Figure 8 for staged relative expression data. Note that the expression patterns of potential regulators diagrammed in this figure represent protein distributions, which often differ slightly from transcript distributions due to time delays inherent in protein synthesis and decay (see Figure 9).

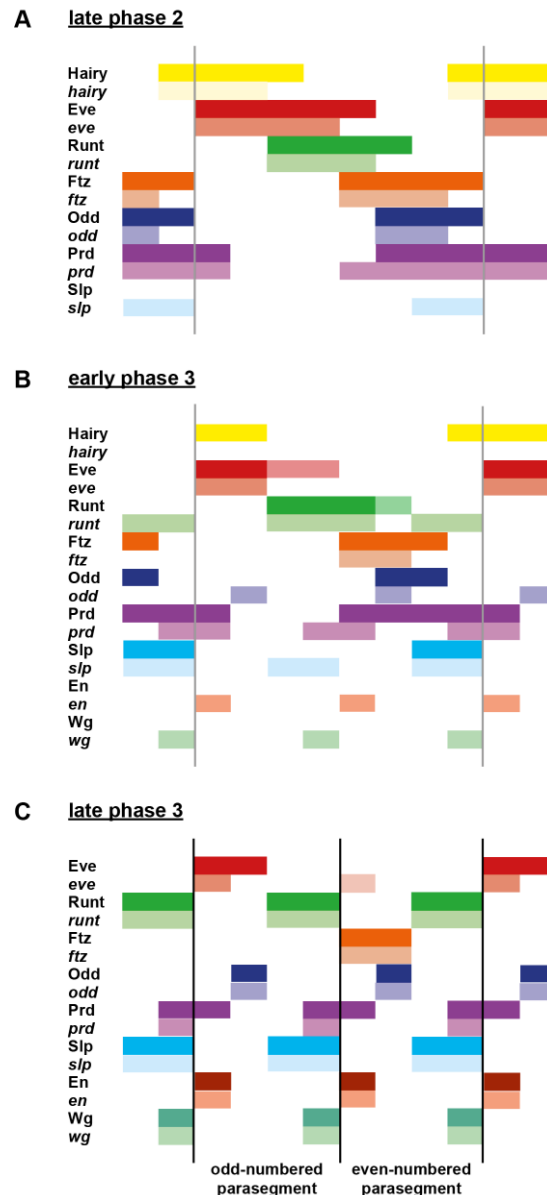

**Figure 9**  
**Schematic diagram of the transition to single segment periodicity.**

Schematic diagram showing segmentation gene expression at late phase 2 (**A**), early phase 3 (**B**), and late phase 3 (**C**). The horizontal axis represents an idealised portion of the AP axis (~12 nuclei across). The grey vertical lines in (**A**,**B**) demarcate a double parasegment repeat (~8 nuclei across). The pattern of protein (intense colour) and transcript (paler colour) expression of the pair-rule genes and selected segment-polarity genes is shown at each timepoint. Transcript distributions were inferred from our double *in situ* data, while protein distributions were inferred mainly from triple antibody stains in the FlyEx database (Pisarev et al. 2009). Black lines in (**C**) indicate future parasegment boundaries. Fading expression of Eve and Runt is represented by lighter red and green sections in (**B**). Note that this diagram does not capture the graded nature of pair-rule protein distributions during cellularisation.

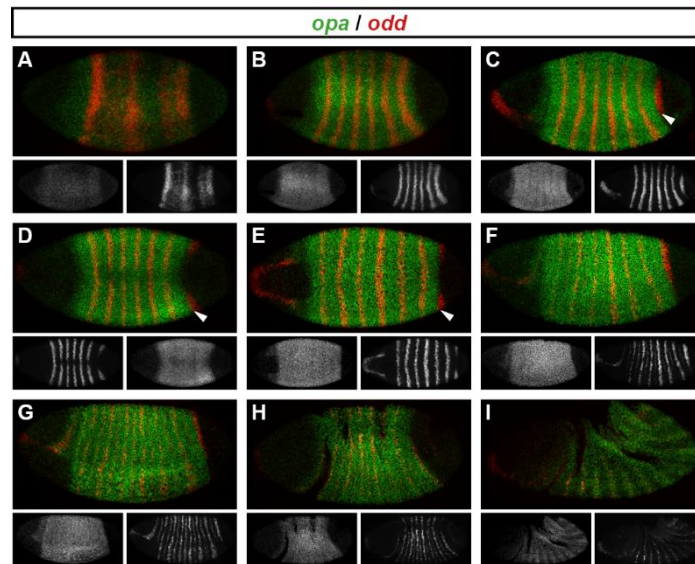

**Figure 10**  
**Spatiotemporal expression of *opa* relative to *odd*.**

Expression of *opa* relative to *odd* from early cellularisation until mid germband extension. (A) phase 1, lateral view; (B) early phase 2; (C-E) late phase 2; (F) early phase 3; (G, H) gastrulation; (I) early germband extension. Anterior left; (A, B, C, F, I) lateral views; (D) dorsal view; (E) ventral view; (G) ventrolateral view; (H) dorsolateral view. Single channel images are shown in greyscale below each double channel image (*opa* on the left, *odd* on the right). Arrowheads in (C-E) point to the new appearance of *odd* stripe 7, which abuts the posterior boundary of the *opa* domain. Note that *odd* stripe 7 is incomplete both dorsally (D) and ventrally (E). By gastrulation, *opa* expression has posteriorly expanded to cover *odd* stripe 7 (G, H). *opa* expression becomes segmentally modulated during germband extension (I).

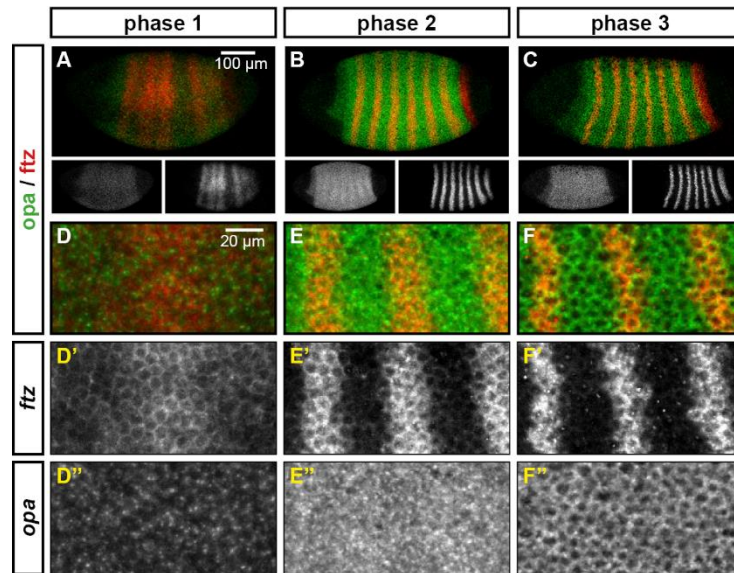

### Figure 10–figure supplement 1

#### The cellular localisation of *opa* transcripts changes over the course of segmentation

Relative expression of *opa* and *ftz* is shown in embryos at phase 1, phase 2 and phase 3. (A-C) Whole embryos, lateral view, anterior left, dorsal top. Single channel images are shown in greyscale below each double channel image (*opa* on the left, *ftz* on the right). (D-F) Blown up regions from each of the embryos in (A-C). Panels with superscripts show individual channels from the double channel images in (D-F). *opa* transcript is largely nuclear during phase 1, and largely cytoplasmic during phase 3.

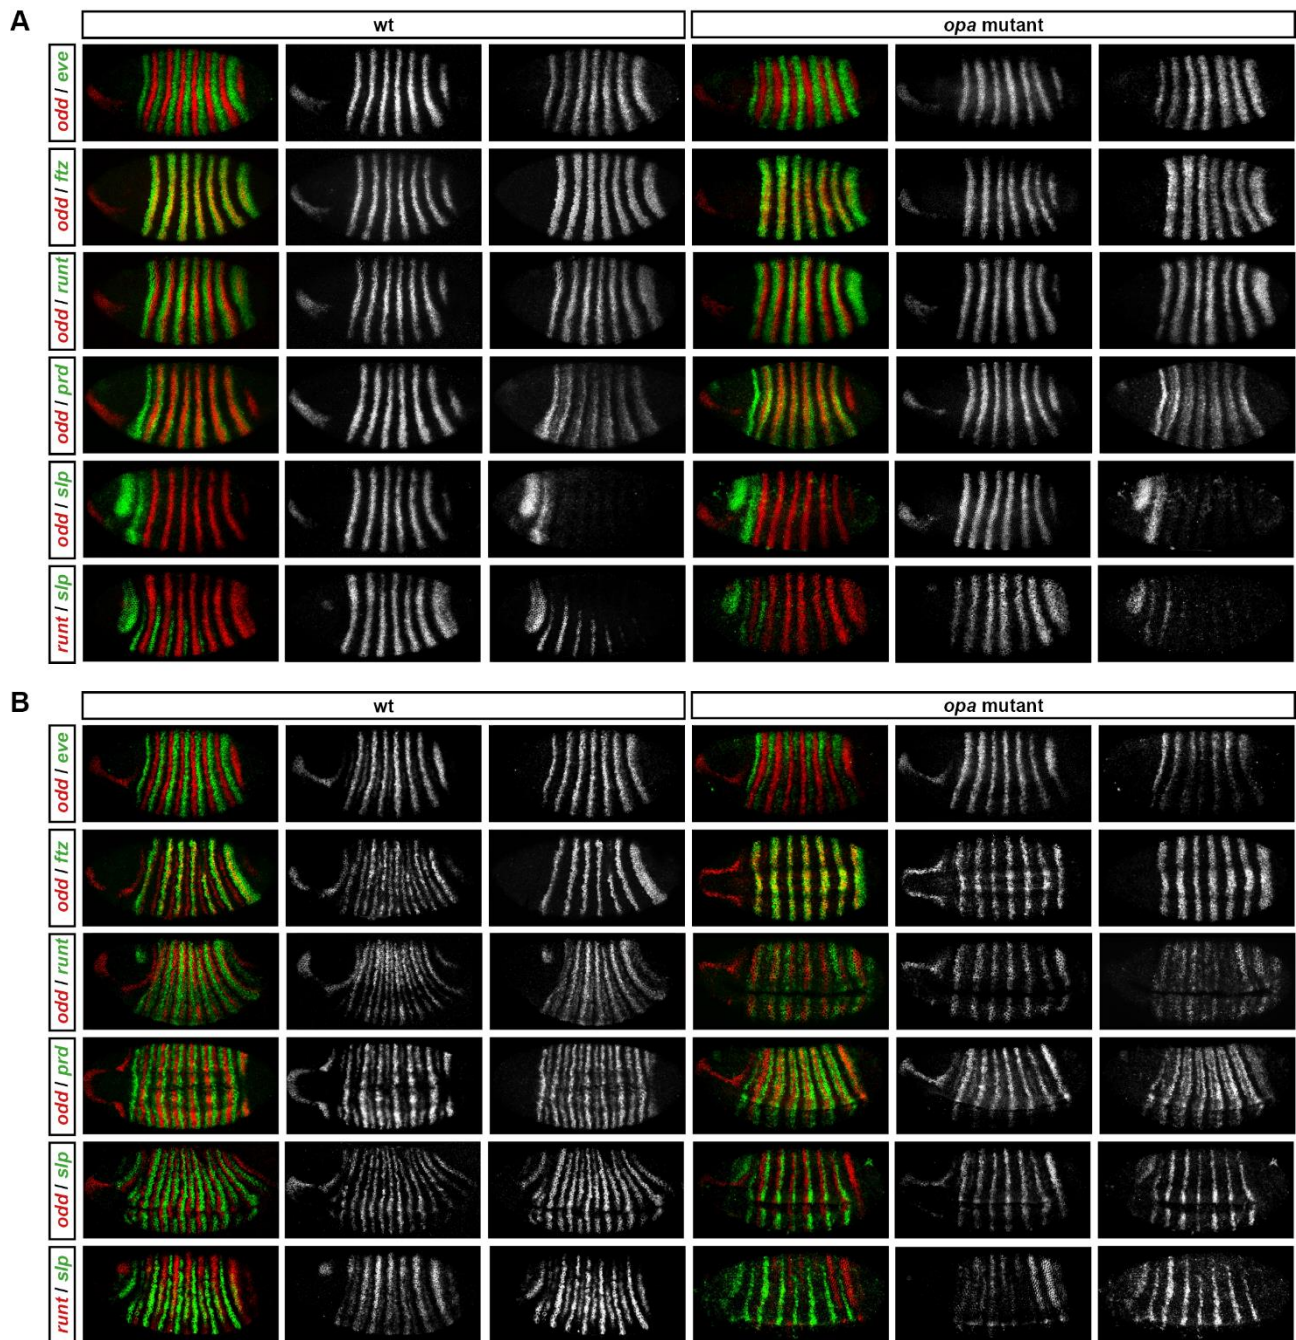

**Figure 11**  
**Pair-rule gene expression is relatively normal during cellularisation in *opa* mutant embryos, but becomes perturbed at gastrulation.**

(A) Pair-rule gene expression in wild-type and *opa* mutant embryos at late phase 2 (mid-cellularisation). (B) Pair-rule gene expression in wild-type and *opa* mutant embryos at late stage 3 (gastrulation): note that single segment patterns do not emerge in *opa* mutant embryos. Individual channels are shown to the right of each double-channel image, in the same order left-to-right as they are listed in the row label. Some panels in (B) show ventral or ventrolateral views. All other panels show a lateral view, anterior left, dorsal top.



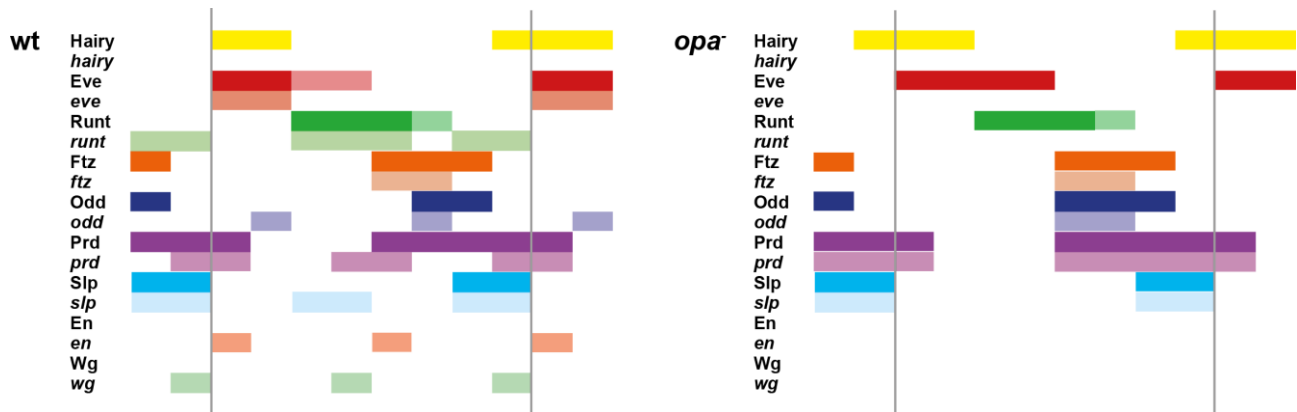

**Figure 11–figure supplement 1**

**The transition to single segment periodicity does not occur in *opa* mutant embryos.**

Comparison of early phase 3 segmentation gene expression in wild-type and *opa* mutant embryos. The horizontal axis represents an idealised portion of the AP axis (~12 nuclei across). The grey vertical lines demarcate a double parasegment repeat (~8 nuclei across), of an odd- followed by an even-numbered parasegment (see Figure 9). The pattern of protein (intense colour) and transcript expression (paler colour) of the pair-rule genes and the segment-polarity genes *en* and *wg* are shown for each genotype. Wild-type patterns are the same as in Figure 9B. Transcript distributions for *opa* mutant embryos were inferred from our double *in situ* data, while protein distributions were extrapolated from transcript data. Fading expression of *Eve* and *Runt* is represented by lighter sections at the posterior of the stripes. In *opa* mutant embryos, expression of *eve* and *runt* fades prematurely, while the expression of *odd*, *prd* and *slp* remains double segmental. Segment-polarity expression is delayed until mid germband extension (Benedyk et al. 1994). Stronger expression in the posterior of the *Eve* stripes in *opa* mutants is inferred from the observation that the *eve* stripes remain broad at a time when they would have already narrowed in wild-type (compare panels A and F in Figure 15).

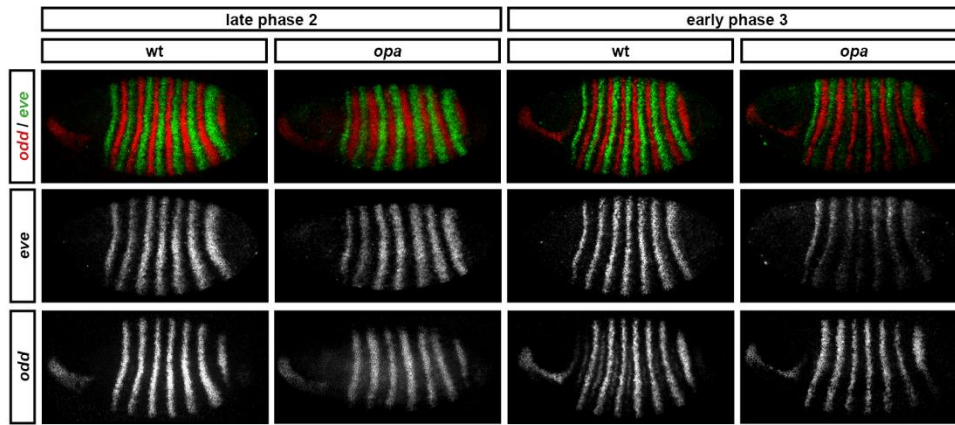

**Figure 12**  
**Opa activates the *eve* “late” element.**

*eve* and *odd* expression in wild-type and *opa* mutant embryos at late phase 2 and early phase 3. *eve* expression largely fades away at phase 3 in *opa* mutant embryos, in contrast to wild-type embryos, where the “late” element generates strong, sharp expression in the anterior halves of the early stripes. Individual channels are shown below each double channel image. All panels show a lateral view, anterior left, dorsal top. The pattern of *odd* expression in the head was used for embryo staging.



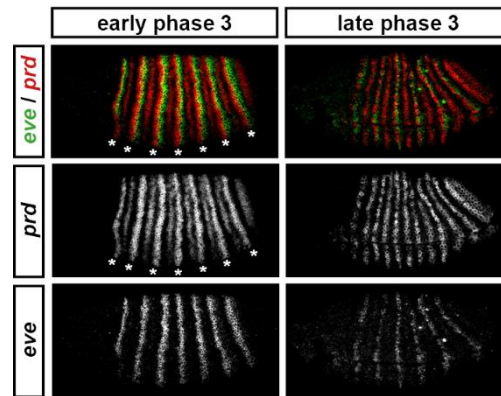

### Figure 12–figure supplement 1

#### “Late” *eve* expression is observed in cells that do not express *prd*

*eve* and *prd* expression in wild-type embryos during phase 3. During early phase 3 (left), *eve* is strongly expressed in stripes ~2 cells wide. These stripes only partially overlap with the “P” stripes of *prd* expression (asterisks), meaning that the *eve* “late” element is active in many cells that have never expressed *prd*. *eve* expression is largely lost from non-*prd* expressing cells by the end of gastrulation (late phase 3, right), indicating that *prd* may nevertheless be required for the maintenance of *eve* late element expression. Individual channels are shown below each double channel image. All panels show a lateral view, anterior left, dorsal top.

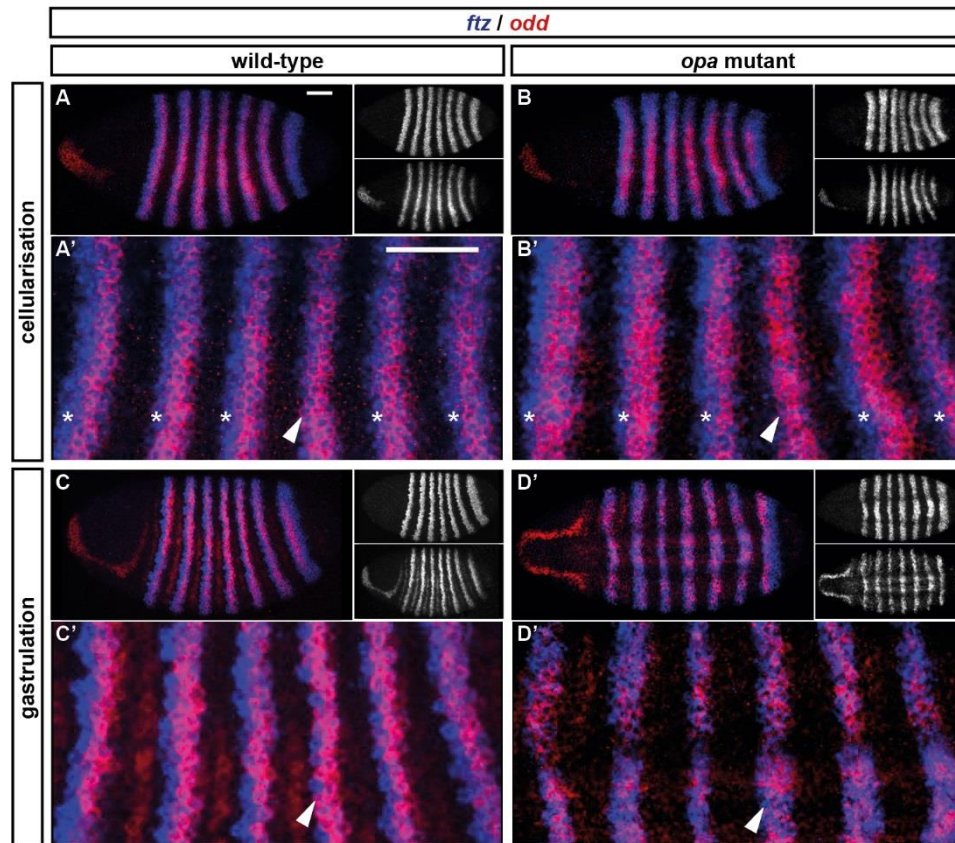

**Figure 13**

**The *ftz/odd* anterior boundary offsets are lost in *opa* mutant embryos at gastrulation.**

Relative expression of *ftz* and *odd* in wild-type and *opa* mutant embryos. (A-D) Whole embryos, anterior left; (A-C) show lateral views, (D) shows a ventral view. Single channels are shown to the right of each double channel image (*ftz* top, *odd* bottom). (A'-D') Blow-ups of stripes 1-6. Arrowheads point to stripe 4, for which neither *ftz* nor *odd* possesses a stripe-specific element. Asterisks in (A', B') indicate early *ftz/odd* offsets in stripes where *ftz* expression is partially driven by stripe-specific elements. Scale bars = 50  $\mu$ m.

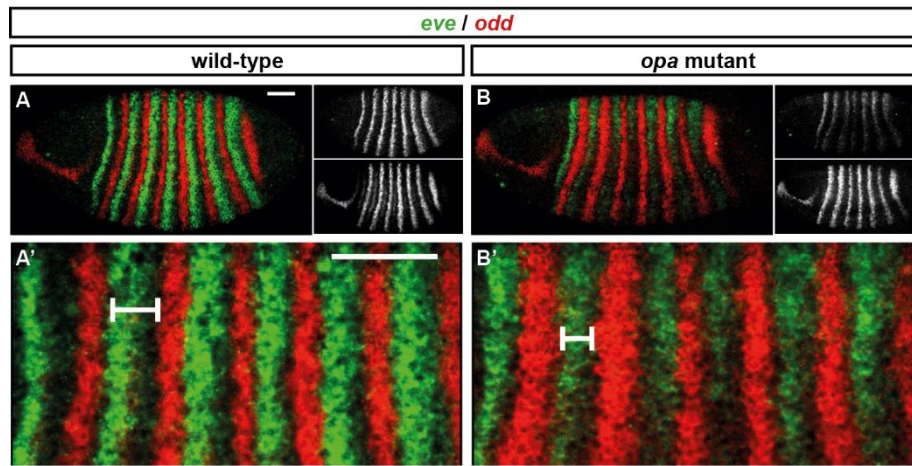

**Figure 13–figure supplement 1**

**The *odd* primary stripes expand anteriorly in *opa* mutant embryos.**

Relative expression of *eve* and *odd* at early phase 3 in wild-type and *opa* mutant embryos. (**A**, **B**) Whole embryos, lateral view, anterior left, dorsal top. Individual channels are shown to the right of the double channel image (*eve* top, *odd* bottom). (**A'**, **B'**) Blow ups of stripe 1-6. The distance between the anterior border of *eve* stripe 2 and the anterior border of *odd* stripe 2 is indicated for both embryos. Scale bars = 50  $\mu$ m.

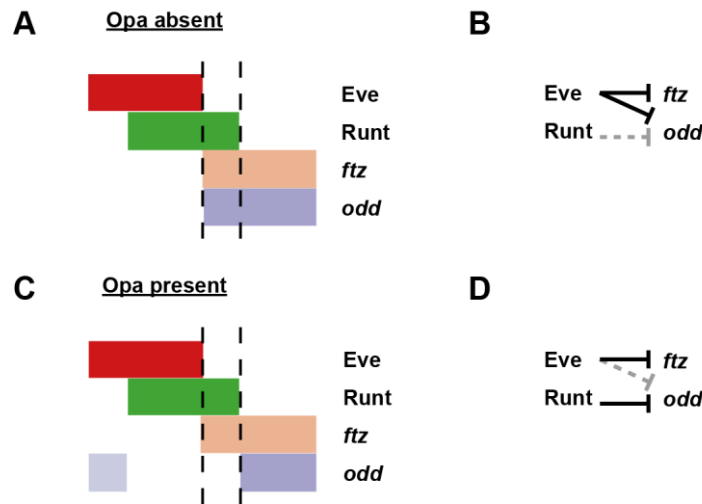

### Figure 13–figure supplement 2

#### Model for the patterning of the anterior boundaries of *ftz* and *odd*.

Model for the regulation of *ftz* and *odd* expression by Eve and Runt, in both the absence (A, B) and the presence (C, D) of Opa protein. (A, C) Schematic diagrams showing the expression of *ftz* and *odd* relative to Eve and Runt protein. The horizontal axis represents part of a typical double-segment pattern repeat along the AP axis of the embryo. In both scenarios, the posterior boundary of Runt expression is shifted posteriorly relative to that of Eve (dashed lines). (B, D) Inferred regulatory interactions. Hammerhead arrows represent repressive interactions. Solid black arrows represent interactions that are currently in operation; dashed grey arrows represent those that are not. (A, B) Eve represses both *ftz* and *odd*, while Runt represses neither. The anterior boundary of both *ftz* and *odd* is therefore positioned by the posterior boundary of Eve. (C, D) Eve represses *ftz*, while Runt represses *odd*. The anterior boundary of *ftz* expression is therefore set by the posterior boundary of Eve, while the anterior boundary of *odd* is positioned by the posterior boundary of Runt. A secondary stripe of *odd* (pale blue) appears within the Eve domain.

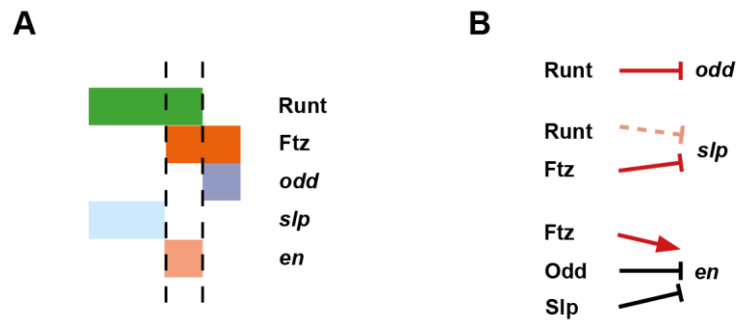

**Figure 14**

**Model for the Opa-dependent patterning of the even-numbered parasegment boundaries**

(A) Schematic showing the phasing of *odd*, *slp* and *en* relative to Runt and Ftz protein at phase 3. The horizontal axis represents part of a typical double-segment pattern repeat along the AP axis of the embryo (~4 nuclei across, centred on an even-numbered parasegment boundary). (B) Inferred regulatory interactions governing the expression of *odd*, *slp* and *en* at phase 3. Regular arrows represent activatory interactions; hammerhead arrows represent repressive interactions. Solid arrows represent interactions that are currently in operation; pale dashed arrows represent those that are not. Red arrows represent interactions that depend on the presence of Opa protein. Overlapping domains of Runt and Ftz expression (A) subdivide this region of the AP axis into three sections (black dashed lines). Opa-dependent repression restricts *odd* expression to the posterior section, resulting in offset anterior boundaries of Ftz and Odd activity (Figure 13; Figure 13–figure supplement 2). *slp* expression is restricted to the anterior section by the combination of Opa-dependent repression from Ftz and Opa-dependent de-repression from Runt (Figure 7–figure supplement 1). *en* is restricted to the central section by the combination of Opa-dependent activation from Ftz, and repression by Odd. Later, mutual repression between *odd*, *slp* and *en* will maintain these distinct cell states. The even-numbered parasegment boundaries will form between the *en* and *slp* domains. Note that, in this model, Eve has no direct role in patterning these boundaries.



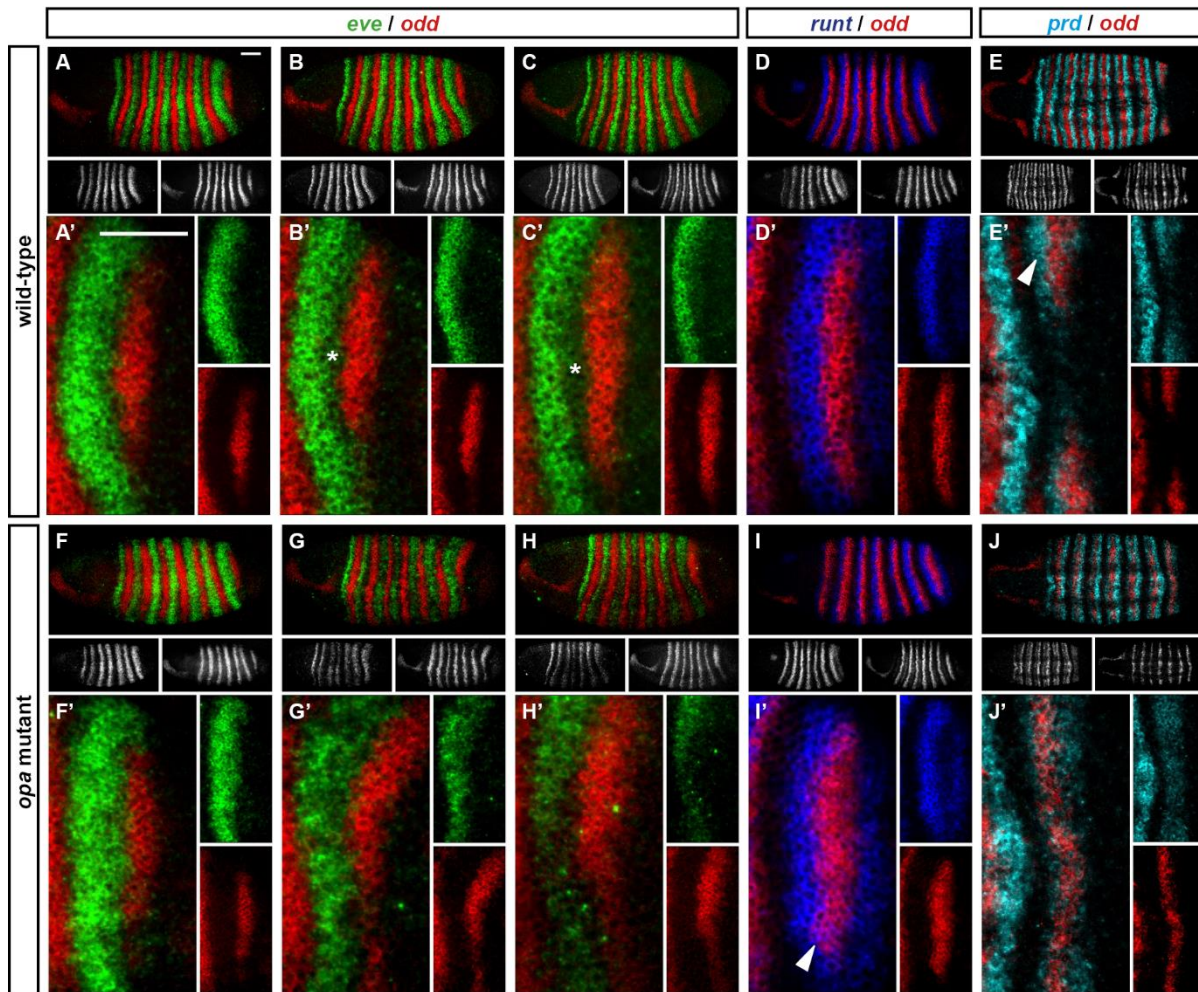

**Figure 15**  
*odd* stripe 7 expands anteriorly and ventrally in *opa* mutants.

Expression of *odd* relative to that of *eve*, *runt* and *prd*, in wild-type and *opa* mutant embryos. (A-J) Whole embryos, individual channels shown below each double channel image (*odd* right). (A, F) Late phase 2, lateral view; (B-D, G-I) early phase 3, lateral view; (E, J) mid phase 3, ventral view. (A'-J') Blow-ups of stripe 7 region (images rotated so that stripes appear vertical). (A'-C', F'-H') The anterior boundary of *odd* stripe 7 remains correlated with the posterior boundary of *eve* stripe 7 during phase 3 in *opa* mutant embryos, but not in wild-type. Asterisks in (B, C) indicate regions free of both *eve* and *odd* expression. Note that in *opa* mutant embryos, the *eve* stripes gradually fade away, while in wild-type they narrow from the posterior but remain strongly expressed. (D', I') The *odd* stripe 7 expands anteriorly relative to *runt* stripe 7 in *opa* mutant embryos. In wild-type embryos, *odd* expression does not overlap with *runt* expression after the posterior half of *runt* stripe 7 becomes repressed (D'). In *opa* mutant embryos, the anterior border of *odd* stripe 7 overlaps with *runt* expression (purple regions in I'). Arrowhead points to a conspicuous region of *odd/runt* co-expression. (E', J') *odd* stripe 7 expands anteriorly relative to *prd* expression in *opa* mutant embryos, while the expression of both genes expands ventrally compared to wild-type. Arrowhead in (E') points to *prd* expression anterior to *odd* stripe 7. Scale bars = 50  $\mu$ m.



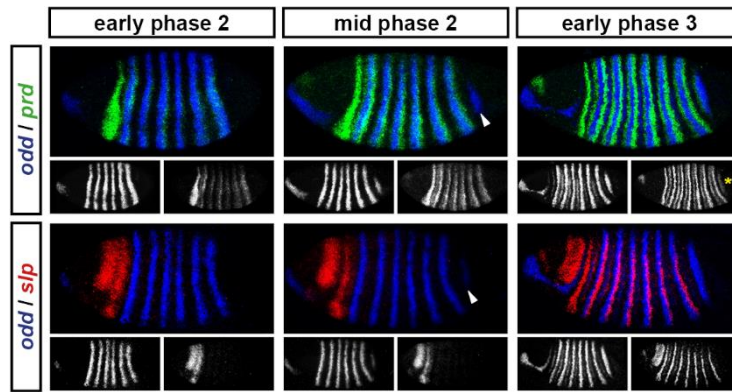

**Figure 15–figure supplement 1**

***odd* stripe 7 appears after the primary stripes of *prd*, but before the primary stripes of *slp*.**

Expression of *odd* relative to that of *prd* and *slp* over the course of cellularisation. At early phase 2, *prd* expression in the trunk has appeared, and there are only 6 *odd* stripes. At mid phase 2, *odd* stripe 7 (arrowheads) is appearing, and there is no sign of the trunk stripes of *slp*. At early phase 3, *prd* stripe 8 (asterisk), which overlaps with *odd* stripe 7, has appeared, and the *slp* primary stripes are well-established. Individual channels are shown below each double channel image (*odd* left, *prd/sl*p right).

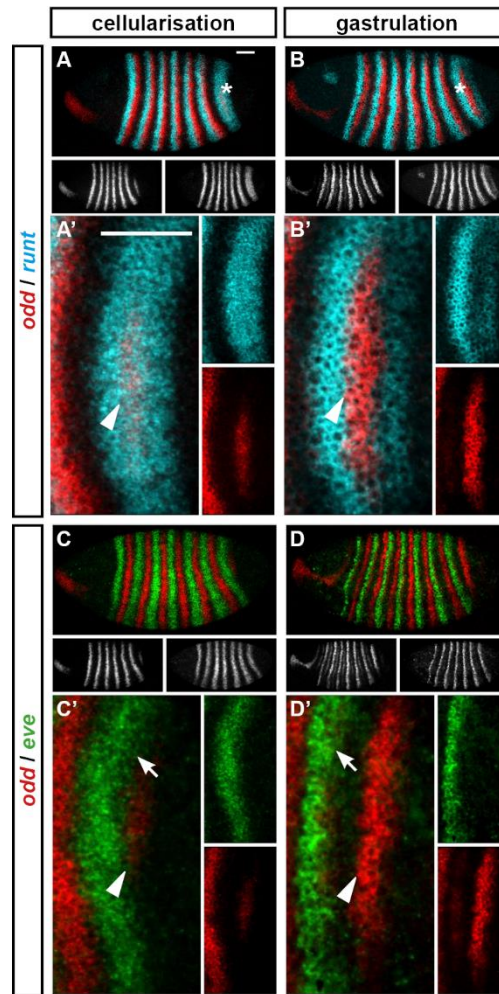

**Figure 15–figure supplement 2**

**The posterior border of *eve* stripe 7 shifts anteriorly relative to the anterior border of *odd* stripe 7.**

Expression of *odd* relative to that of *runt* and *eve*, in wild-type embryos at cellularisation (mid phase 2) and gastrulation (phase 3). (A–D) Whole embryos, lateral view, anterior left, dorsal top. Individual channels are shown below each double channel image (*odd* left, *runt/eve* right). Asterisks mark the stripe 7 region. (A'–D') Blow-ups of the stripe 7 region (images rotated so that the stripes appear vertical). Individual channels are shown to the right of each double channel image. Arrowheads in (A'–D') mark the anterior border of *odd* stripe 7; arrows in (C', D') mark the posterior border of *eve* stripe 7. Scale bars = 50 μm.

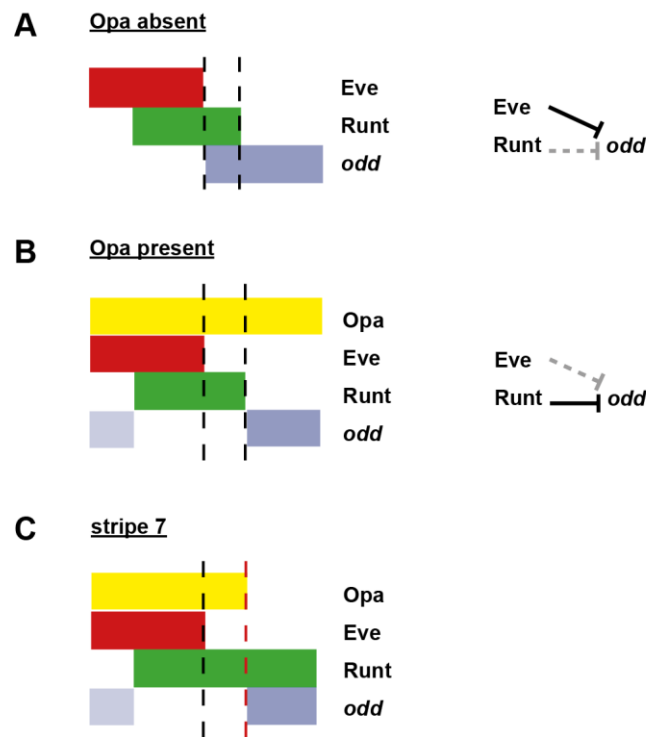

**Figure 15–figure supplement 3**

**Model for the patterning of the anterior boundaries of the *odd* primary stripes**

Schematic showing the phasing of *odd* expression relative to Eve, Runt and Opa protein. The horizontal axis represents part of a double-segment pattern repeat along the AP axis of the embryo. Black dashed lines indicate the posterior boundaries of Eve and Runt expression. **(A)** In the absence of Opa protein, Eve represses *odd*, and Runt does not. The anterior boundary of *odd* is therefore positioned by the posterior boundary of Eve. This scenario applies to phase 2 in wild-type embryos, as well as phase 3 in *opa* mutant embryos. **(B)** In the presence of Opa protein, Runt represses *odd*, but Eve does not. The anterior boundary of *odd* primary stripe expression is therefore positioned by the posterior boundary of Runt, while a secondary stripe (pale blue) appears within the Eve domain. This scenario applies to phase 3 of wild-type embryos. **(C)** The atypical patterning observed for stripe 7. The anterior boundary of *odd* stripe 7 is positioned by the posterior boundary of Opa expression (red dashed line). Anterior to this line, the regulatory network is the same as for **(B)**, while posterior to this line the regulatory network is the same as for **(A)**. Hammerhead arrows represent repressive interactions. Solid black arrows represent interactions that are currently in operation; dashed grey arrows represent those that are not.
